# Supplementary material for: Human origin ascertained for SARS-CoV-2 Omicron-like spike sequences detected in wastewater: a targeted surveillance study of a cryptic lineage in an urban sewershed
Source: bioRxiv or medRxiv preprint supplement (doi:10.1101/2022.10.28.22281553), 2023-09-22
Supplement: Supplementary file [file media-2.pdf]

# Supplemental Figures and Tables

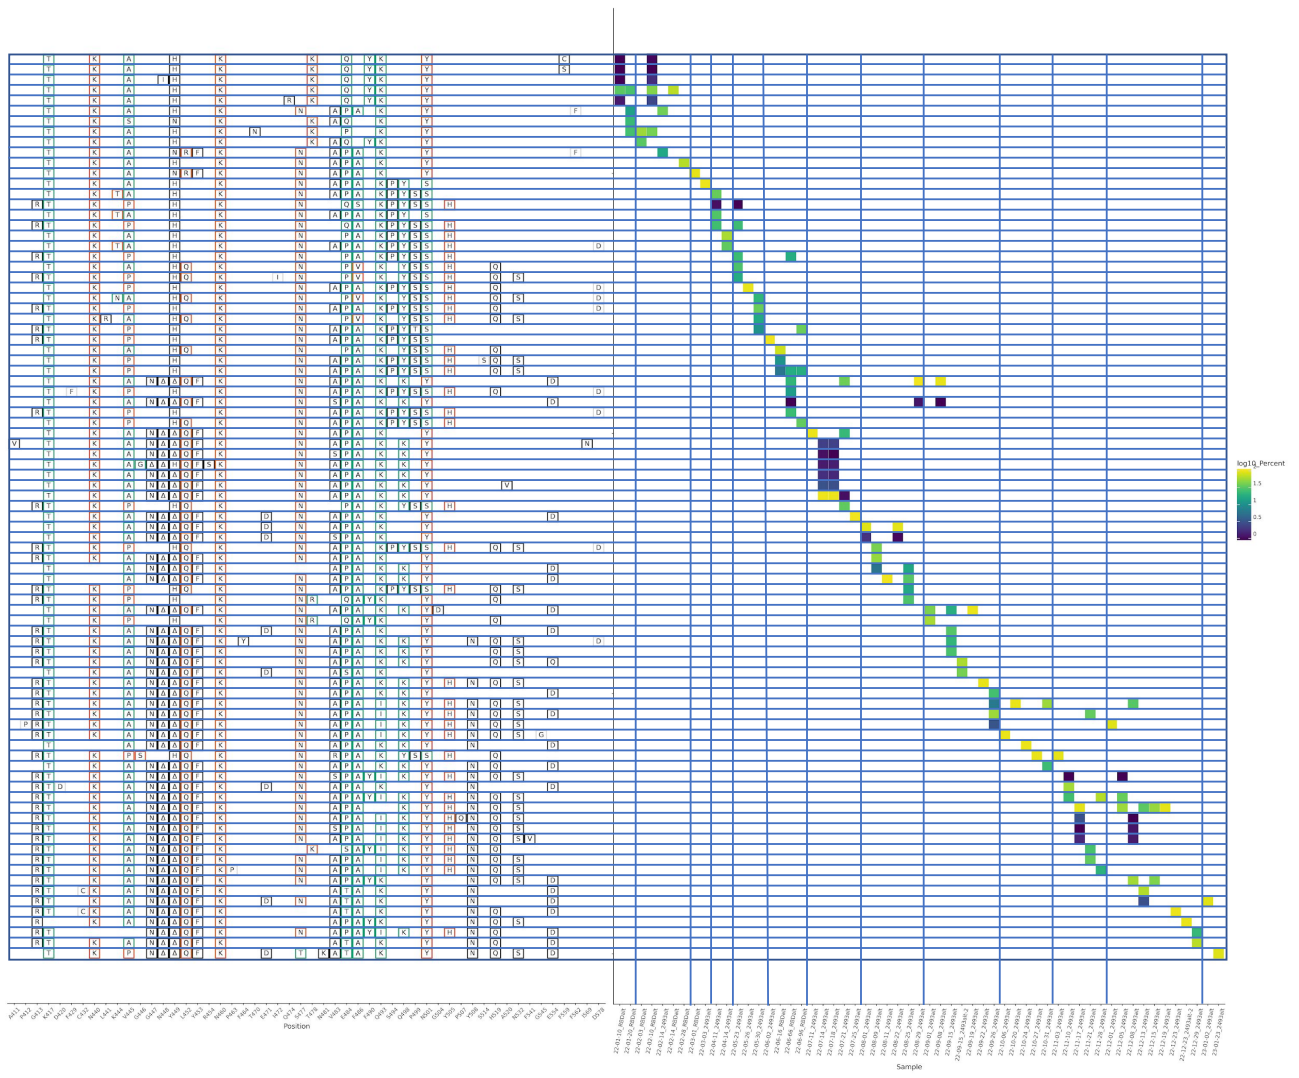

**Supplemental Figure 1.** All variants above 10% frequency in Wisconsin Lineage RBD sequences from Sub-District 5 are shown on the left side and are organized by haplotype. The presence and abundance within a sample are shown on the right side.

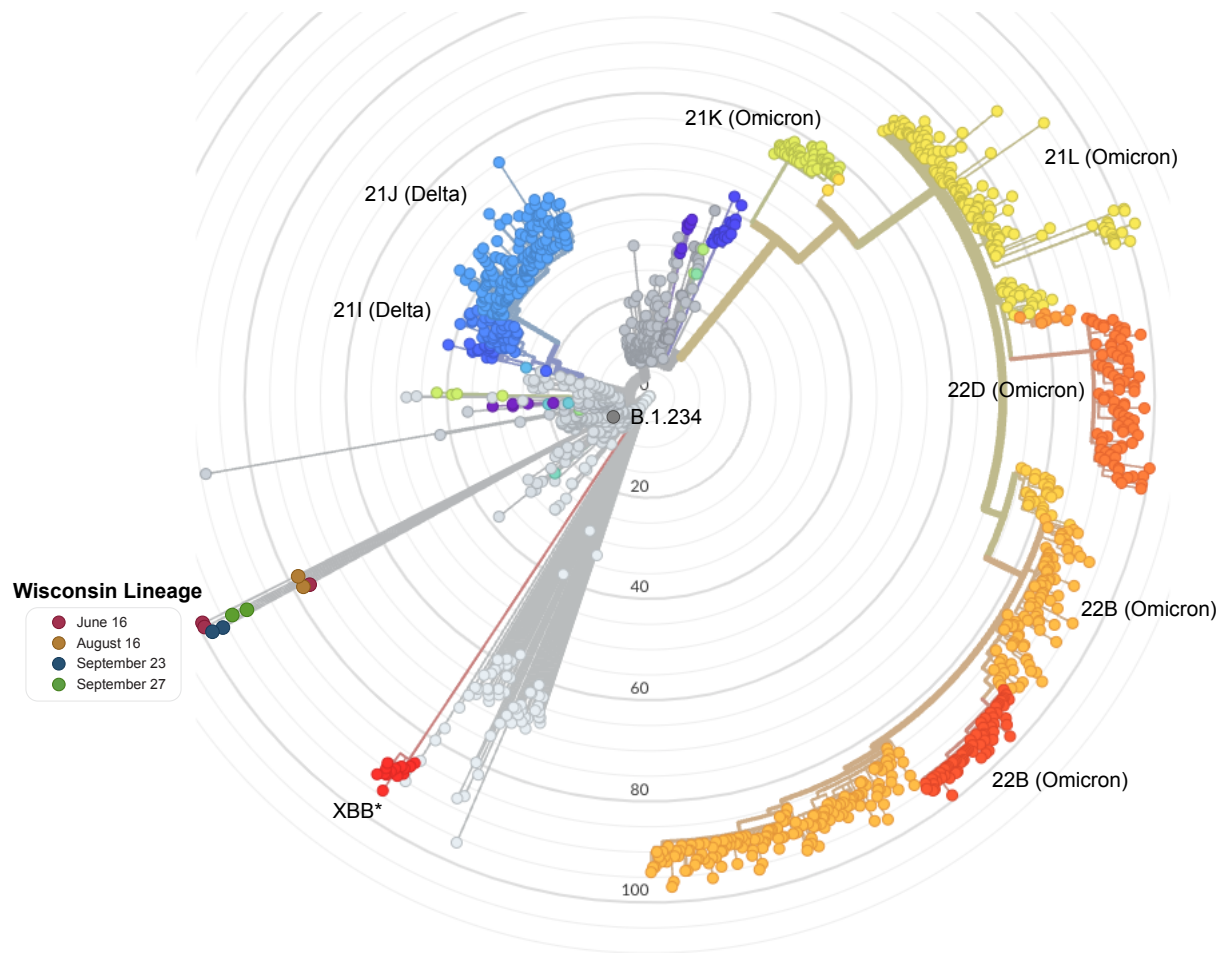

**Supplemental Figure 2. Radial phylogenetic tree generated by Nextclade.<sup>1</sup>** Consensus fasta files generated for each sequence replicate of Facility Line B samples are shown. Although differences exist between some replicate sequences, the Wisconsin Lineage greatly diverges from its B.1.234 backbone and is similarly divergent to Omicron lineages.

| Species               | Common Name                         | Facility Line B (June) |                   |
|-----------------------|-------------------------------------|------------------------|-------------------|
|                       |                                     | Average Count          | Average Abundance |
| Homo sapiens          | Human                               | 116,842.68             | 88.22%            |
| Unmatched             | Unmatched                           | 12,522.80              | 9.46%             |
| Pan paniscus          | Human, chimp, but more likely human | 4,507.00               | 3.40%             |
| Poor match            |                                     | 794.00                 | 0.60%             |
| Elephantulus fuscipes | Human - mismatch, human             | 72.00                  | 0.05%             |
| Gallus gallus         | Bird, Chicken                       | 49.00                  | 0.04%             |
| Bos taurus            | Cattle                              | 30.00                  | 0.02%             |
| Pan troglodytes       | Human, chimp, but also human        | 29.00                  | 0.02%             |

**Supplemental Table 1. Abundance of contributing species to the June Facility Line B sample.** 12S ribosomal RNA (rRNA) sequencing was performed on two replicates of the June sample of Facility Line B. The average count and abundance between these two samples is shown. *Homo sapiens* (human) was found to be the predominant contributor to this sample. Cow and chicken rRNA were the second and third most abundant (<1% each).

| Variant frequencies<br>by sequencing<br>replicate | 16-Jun-22    |             |             | 16-Aug-22    |             | 23-Sep-22    |             |
|---------------------------------------------------|--------------|-------------|-------------|--------------|-------------|--------------|-------------|
|                                                   | 3 replicates |             |             | 2 replicates |             | 2 replicates |             |
|                                                   | #1 WSLH-152  | #2 WSLH-229 | #3 WSLH-231 | #1 WSLH-206  | #2 WSLH-230 | #1 WSLH-221  | #2 WSLH-222 |
| 22                                                |              |             |             |              |             |              |             |
| orf1ab                                            |              |             |             |              |             |              |             |
| 54                                                |              |             |             | 0.75         |             |              |             |
| orf1ab                                            |              |             |             | 0.75         |             |              |             |
| 78                                                | 0.63         | 0.69        | 0.73        | 0.63         | 0.57        | 0.75         | 0.71        |
| orf1ab                                            | 0.63         | 0.69        | 0.73        | 0.63         | 0.57        | 0.75         | 0.71        |
| 100                                               | 0.63         | 0.69        | 0.73        | 0.63         | 0.57        | 0.75         | 0.71        |
| orf1ab                                            | 0.89         | 0.91        | 1           | 0.96         | 0.88        | 1            | 0.99        |
| 126                                               | 0.89         | 0.91        | 1           | 0.96         | 0.88        | 1            | 0.99        |
| orf1ab                                            |              |             |             | 0.34         | 0.35        | 0.41         | 0.44        |
| 177                                               | 0.76         | 0.74        | 1           | 0.89         | 0.74        | 1            | 0.99        |
| orf1ab                                            | 0.76         | 0.74        | 1           | 0.89         | 0.74        | 1            | 0.99        |
| 190                                               | 0.76         | 0.74        | 1           | 0.89         | 0.74        | 1            | 0.99        |
| orf1ab                                            |              |             | 0.41        |              |             | 0.5          | 0.39        |
| 193                                               |              |             | 0.41        |              |             | 0.5          | 0.39        |
| orf1ab                                            |              |             | 0.41        |              |             | 0.5          | 0.39        |
| 292                                               | 0.58         | 0.45        | 0.46        | 0.69         | 0.71        | 0.91         | 0.86        |
| orf1ab                                            | 0.58         | 0.45        | 0.46        | 0.69         | 0.71        | 0.91         | 0.86        |
| p.N9N                                             | 0.58         | 0.45        | 0.46        | 0.69         | 0.71        | 0.91         | 0.86        |
| 329                                               | 0.27         |             | 0.46        | 0.36         | 0.41        | 0.41         | 0.45        |
| orf1ab                                            | 0.27         |             | 0.46        | 0.36         | 0.41        | 0.41         | 0.45        |
| p.Q22K                                            | 0.27         |             | 0.46        | 0.36         | 0.41        | 0.41         | 0.45        |
| 335                                               | 0.94         | 0.99        | 0.87        | 0.98         | 0.99        | 0.93         | 0.92        |
| orf1ab                                            | 0.94         | 0.99        | 0.87        | 0.98         | 0.99        | 0.93         | 0.92        |
| p.R24C                                            | 0.94         | 0.99        | 0.87        | 0.98         | 0.99        | 0.93         | 0.92        |
| 344                                               |              |             | 0.53        | 0.33         | 0.36        | 0.41         | 0.45        |
| orf1ab                                            |              |             | 0.53        | 0.33         | 0.36        | 0.41         | 0.45        |
| p.L27F                                            |              |             | 0.53        | 0.33         | 0.36        | 0.41         | 0.45        |
| 378                                               | 1            | 1           | 1           | 1            | 1           | 1            | 1           |
| orf1ab                                            | 1            | 1           | 1           | 1            | 1           | 1            | 1           |
| p.V38A                                            | 1            | 1           | 1           | 1            | 1           | 1            | 1           |
| 394                                               | 0.47         | 0.91        | 0.84        | 0.35         | 0.48        | 0.44         | 0.59        |
| orf1ab                                            | 0.47         | 0.91        | 0.84        | 0.35         | 0.48        | 0.44         | 0.59        |
| p.R43R                                            | 0.47         | 0.91        | 0.84        | 0.35         | 0.48        | 0.44         | 0.59        |
| 434                                               | 0.38         | 0.62        | 0.4         | 0.29         | 0.27        | 0.33         | 0.44        |
| orf1ab                                            | 0.38         | 0.62        | 0.4         | 0.29         | 0.27        | 0.33         | 0.44        |
| p.E57K                                            | 0.38         | 0.62        | 0.4         | 0.29         | 0.27        | 0.33         | 0.44        |
| 485                                               |              | 0.38        | 0.45        | 0.28         | 0.48        | 0.45         | 0.52        |
| orf1ab                                            |              | 0.38        | 0.45        | 0.28         | 0.48        | 0.45         | 0.52        |
| p.S74T                                            |              | 0.38        | 0.45        | 0.28         | 0.48        | 0.45         | 0.52        |
| 488                                               |              |             |             |              |             | 0.3          | 0.34        |
| orf1ab                                            |              |             |             |              |             | 0.3          | 0.34        |
| p.D75N                                            |              |             |             |              |             | 0.3          | 0.34        |
| 507                                               |              | 0.38        | 0.4         |              | 0.31        | 0.38         | 0.45        |
| orf1ab                                            |              | 0.38        | 0.4         |              | 0.31        | 0.38         | 0.45        |
| p.H81L                                            |              | 0.38        | 0.4         |              | 0.31        | 0.38         | 0.45        |
| 509                                               | 0.4          | 0.47        | 0.48        | 0.36         | 0.57        | 0.47         | 0.48        |
| orf1ab                                            | 0.4          | 0.47        | 0.48        | 0.36         | 0.57        | 0.47         | 0.48        |
| p.G82fs                                           | 0.4          | 0.47        | 0.48        | 0.36         | 0.57        | 0.47         | 0.48        |
| 518                                               | 0.65         | 0.74        | 0.52        | 0.63         | 0.73        | 0.75         | 0.75        |
| orf1ab                                            | 0.65         | 0.74        | 0.52        | 0.63         | 0.73        | 0.75         | 0.75        |
| p.M85fs                                           | 0.65         | 0.74        | 0.52        | 0.63         | 0.73        | 0.75         | 0.75        |
| 539                                               | 0.67         | 0.74        | 0.63        | 0.67         | 0.81        | 0.82         | 0.8         |
| orf1ab                                            | 0.67         | 0.74        | 0.63        | 0.67         | 0.81        | 0.82         | 0.8         |
| p.L92F                                            | 0.67         | 0.74        | 0.63        | 0.67         | 0.81        | 0.82         | 0.8         |
| 561                                               |              |             |             | 0.36         | 0.6         | 0.67         | 0.76        |
| orf1ab                                            |              |             |             | 0.36         | 0.6         | 0.67         | 0.76        |
| p.R99H                                            |              |             |             | 0.36         | 0.6         | 0.67         | 0.76        |
| 569                                               |              | 0.26        |             |              |             |              |             |
| orf1ab                                            |              | 0.26        |             |              |             |              |             |
| p.E102K                                           |              | 0.26        |             |              |             |              |             |
| 573                                               |              | 0.32        |             |              |             |              |             |
| orf1ab                                            |              | 0.32        |             |              |             |              |             |
| p.T103I                                           |              | 0.32        |             |              |             |              |             |
| 632                                               | 0.78         | 0.87        | 0.96        | 0.89         | 0.57        | 0.86         | 0.92        |
| orf1ab                                            | 0.78         | 0.87        | 0.96        | 0.89         | 0.57        | 0.86         | 0.92        |
| p.L123F                                           | 0.78         | 0.87        | 0.96        | 0.89         | 0.57        | 0.86         | 0.92        |
| 649                                               |              |             | 0.42        | 0.44         | 0.31        | 0.78         | 0.68        |
| orf1ab                                            |              |             | 0.42        | 0.44         | 0.31        | 0.78         | 0.68        |

|           |      |      |      |      |      |      |      |
|-----------|------|------|------|------|------|------|------|
| p.NI28N   |      |      | 0.42 | 0.44 | 0.31 | 0.78 | 0.68 |
| 657       |      |      |      | 0.34 |      |      |      |
| orf1ab    |      |      |      | 0.34 |      |      |      |
| p.G133del |      |      |      | 0.34 |      |      |      |
| 694       |      |      | 0.32 |      |      | 0.54 | 0.43 |
| orf1ab    |      |      | 0.32 |      |      | 0.54 | 0.43 |
| p.F143L   |      |      | 0.32 |      |      | 0.54 | 0.43 |
| 733       |      |      |      |      |      |      |      |
| orf1ab    |      |      |      |      |      |      |      |
| p.D156E   |      |      |      |      |      |      |      |
| 758       | 0.25 |      | 0.46 | 0.3  |      |      | 0.33 |
| orf1ab    | 0.25 |      | 0.46 | 0.3  |      |      | 0.33 |
| p.H165Y   | 0.25 |      | 0.46 | 0.3  |      |      | 0.33 |
| 763       |      |      |      | 0.34 |      | 0.44 | 0.49 |
| orf1ab    |      |      |      | 0.34 |      | 0.44 | 0.49 |
| p.S166S   |      |      |      | 0.34 |      | 0.44 | 0.49 |
| 764       | 0.75 | 1    | 0.54 | 0.68 | 0.81 | 0.77 | 0.67 |
| orf1ab    | 0.75 | 1    | 0.54 | 0.68 | 0.81 | 0.77 | 0.67 |
| p.S167G   | 0.75 | 1    | 0.54 | 0.68 | 0.81 | 0.77 | 0.67 |
| 843       |      |      | 0.25 |      |      |      |      |
| orf1ab    |      |      | 0.25 |      |      |      |      |
| p.D194fs  |      |      | 0.25 |      |      |      |      |
| 872       |      |      |      |      | 0.27 |      |      |
| orf1ab    |      |      |      |      | 0.27 |      |      |
| p.D203N   |      |      |      |      | 0.27 |      |      |
| 1246      |      |      | 0.31 |      |      |      |      |
| orf1ab    |      |      | 0.31 |      |      |      |      |
| p.G327G   |      |      | 0.31 |      |      |      |      |
| 1598      | 0.34 | 0.43 | 0.38 | 0.42 | 0.58 | 0.52 | 0.58 |
| orf1ab    | 0.34 | 0.43 | 0.38 | 0.42 | 0.58 | 0.52 | 0.58 |
| p.G445C   | 0.34 | 0.43 | 0.38 | 0.42 | 0.58 | 0.52 | 0.58 |
| 2258      | 1    | 1    | 1    | 0.99 | 1    | 1    | 1    |
| orf1ab    | 1    | 1    | 1    | 0.99 | 1    | 1    | 1    |
| p.V665I   | 1    | 1    | 1    | 0.99 | 1    | 1    | 1    |
| 2359      |      | 1    |      |      |      | 0.28 |      |
| orf1ab    |      | 1    |      |      |      | 0.28 |      |
| p.A698A   |      | 1    |      |      |      | 0.28 |      |
| 2434      |      | 0.3  |      |      |      |      |      |
| orf1ab    |      | 0.3  |      |      |      |      |      |
| p.S723S   |      | 0.3  |      |      |      |      |      |
| 2445      | 0.31 | 0.7  | 0.29 | 0.65 | 0.84 | 0.38 | 0.52 |
| orf1ab    | 0.31 | 0.7  | 0.29 | 0.65 | 0.84 | 0.38 | 0.52 |
| p.T727I   | 0.31 | 0.7  | 0.29 | 0.65 | 0.84 | 0.38 | 0.52 |
| 2557      |      |      |      |      |      | 0.49 |      |
| orf1ab    |      |      |      |      |      | 0.49 |      |
| p.Q764Q   |      |      |      |      |      | 0.49 |      |
| 2600      |      | 0.44 |      |      |      |      |      |
| orf1ab    |      | 0.44 |      |      |      |      |      |
| p.V779I   |      | 0.44 |      |      |      |      |      |
| 2664      |      | 0.5  |      |      |      |      |      |
| orf1ab    |      | 0.5  |      |      |      |      |      |
| p.C800Y   |      | 0.5  |      |      |      |      |      |
| 2695      |      | 0.37 |      |      |      |      |      |
| orf1ab    |      | 0.37 |      |      |      |      |      |
| p.N810N   |      | 0.37 |      |      |      |      |      |
| 2706      | 0.72 | 1    | 0.95 |      |      | 0.34 |      |
| orf1ab    | 0.72 | 1    | 0.95 |      |      | 0.34 |      |
| p.T814I   | 0.72 | 1    | 0.95 |      |      | 0.34 |      |
| 2713      |      |      |      | 0.44 | 0.38 | 0.41 | 0.41 |
| orf1ab    |      |      |      | 0.44 | 0.38 | 0.41 | 0.41 |
| p.K816N   |      |      |      | 0.44 | 0.38 | 0.41 | 0.41 |
| 2825      | 0.49 | 0.45 | 0.39 | 0.49 | 0.61 | 0.49 | 0.62 |
| orf1ab    | 0.49 | 0.45 | 0.39 | 0.49 | 0.61 | 0.49 | 0.62 |
| p.N854D   | 0.49 | 0.45 | 0.39 | 0.49 | 0.61 | 0.49 | 0.62 |
| 2937      |      |      | 1    |      |      |      |      |
| orf1ab    |      |      | 1    |      |      |      |      |
| p.T891I   |      |      | 1    |      |      |      |      |
| 2946      | 0.35 | 0.76 |      |      |      |      | 0.28 |
| orf1ab    | 0.35 | 0.76 |      |      |      |      | 0.28 |
| p.G894D   | 0.35 | 0.76 |      |      |      |      | 0.28 |
| 2948      |      |      |      | 0.29 |      | 0.41 | 0.27 |
| orf1ab    |      |      |      | 0.29 |      | 0.41 | 0.27 |
| p.I895V   |      |      |      | 0.29 |      | 0.41 | 0.27 |
| 3037      | 1    | 1    | 1    | 1    | 1    | 1    | 1    |
| orf1ab    | 1    | 1    | 1    | 1    | 1    | 1    | 1    |
| p.F924F   | 1    | 1    | 1    | 1    | 1    | 1    | 1    |
| 3040      |      |      |      |      |      |      |      |
| orf1ab    |      |      |      |      |      |      |      |
| p.Y925Y   |      |      |      |      |      |      |      |
| 3047      |      |      | 0.5  |      |      |      | 0.49 |
| orf1ab    |      |      | 0.5  |      |      |      | 0.49 |
| p.D928Y   |      |      | 0.5  |      |      |      | 0.49 |

|                  |      |  |      |      |      |      |      |      |      |
|------------------|------|--|------|------|------|------|------|------|------|
| 3307             |      |  | 0.3  |      |      |      |      |      |      |
| orflab           |      |  | 0.3  |      |      |      |      |      |      |
| p.M1014I         |      |  | 0.3  |      |      |      |      |      |      |
| 3331             | 0.31 |  | 0.3  | 0.26 |      |      |      |      |      |
| orflab           | 0.31 |  | 0.3  | 0.26 |      |      |      |      |      |
| p.I1023 V1025del | 0.31 |  | 0.3  | 0.26 |      |      |      |      |      |
| 3715             |      |  |      | 0.58 |      |      |      |      |      |
| orflab           |      |  |      | 0.58 |      |      |      |      |      |
| p.S1150S         |      |  |      | 0.58 |      |      |      |      |      |
| 3741             | 0.48 |  | 0.4  | 1    | 0.45 | 0.34 | 0.45 |      |      |
| orflab           | 0.48 |  | 0.4  | 1    | 0.45 | 0.34 | 0.45 |      |      |
| p.I1159T         | 0.48 |  | 0.4  | 1    | 0.45 | 0.34 | 0.45 |      |      |
| 3743             | 0.37 |  | 0.42 |      | 0.31 | 0.49 | 0.26 | 0.36 |      |
| orflab           | 0.37 |  | 0.42 |      | 0.31 | 0.49 | 0.26 | 0.36 |      |
| p.H1160Y         | 0.37 |  | 0.42 |      | 0.31 | 0.49 | 0.26 | 0.36 |      |
| 3745             |      |  |      |      |      |      | 0.29 | 0.46 |      |
| orflab           |      |  |      |      |      |      | 0.29 | 0.46 |      |
| p.H1160Q         |      |  |      |      |      |      | 0.29 | 0.46 |      |
| 3828             |      |  | 0.97 |      | 0.57 | 0.93 | 0.65 | 0.96 |      |
| orflab           |      |  | 0.97 |      | 0.57 | 0.93 | 0.65 | 0.96 |      |
| p.S1188L         |      |  | 0.97 |      | 0.57 | 0.93 | 0.65 | 0.96 |      |
| 3967             | 1    |  | 1    | 1    | 1    | 1    | 1    | 1    |      |
| orflab           | 1    |  | 1    | 1    | 1    | 1    | 1    | 1    |      |
| p.A1234A         | 1    |  | 1    | 1    | 1    | 1    | 1    | 1    |      |
| 4113             | 0.31 |  | 0.48 | 0.39 | 0.3  | 0.44 |      |      |      |
| orflab           | 0.31 |  | 0.48 | 0.39 | 0.3  | 0.44 |      |      |      |
| p.A1283V         | 0.31 |  | 0.48 | 0.39 | 0.3  | 0.44 |      |      |      |
| 4159             |      |  |      |      |      |      |      |      | 0.33 |
| orflab           |      |  |      |      |      |      |      |      | 0.33 |
| p.A1298A         |      |  |      |      |      |      |      |      | 0.33 |
| 4181             | 0.58 |  | 0.62 | 0.78 | 0.61 | 0.53 | 0.5  | 0.48 |      |
| orflab           | 0.58 |  | 0.62 | 0.78 | 0.61 | 0.53 | 0.5  | 0.48 |      |
| p.A1306T         | 0.58 |  | 0.62 | 0.78 | 0.61 | 0.53 | 0.5  | 0.48 |      |
| 4207             |      |  |      |      |      |      | 0.3  |      |      |
| orflab           |      |  |      |      |      |      | 0.3  |      |      |
| p.A1314A         |      |  |      |      |      |      | 0.3  |      |      |
| 4369             |      |  | 0.4  | 1    | 0.47 | 0.44 | 0.79 | 0.95 |      |
| orflab           |      |  | 0.4  | 1    | 0.47 | 0.44 | 0.79 | 0.95 |      |
| p.L1368L         |      |  | 0.4  | 1    | 0.47 | 0.44 | 0.79 | 0.95 |      |
| 4454             |      |  |      | 0.54 |      |      | 0.29 | 0.3  |      |
| orflab           |      |  |      | 0.54 |      |      | 0.29 | 0.3  |      |
| p.A1397T         |      |  |      | 0.54 |      |      | 0.29 | 0.3  |      |
| 4475             |      |  |      |      |      |      | 0.29 |      |      |
| orflab           |      |  |      |      |      |      | 0.29 |      |      |
| p.R1404C         |      |  |      |      |      |      | 0.29 |      |      |
| 4476             |      |  |      | 0.54 |      |      |      |      |      |
| orflab           |      |  |      | 0.54 |      |      |      |      |      |
| p.R1404H         |      |  |      | 0.54 |      |      |      |      |      |
| 4484             | 0.31 |  | 1    | 0.46 |      |      |      |      |      |
| orflab           | 0.31 |  | 1    | 0.46 |      |      |      |      |      |
| p.K1407O         |      |  | 1    | 0.46 |      |      |      |      |      |
| p.K1407R         | 0.31 |  |      |      |      |      |      |      |      |
| 4485             |      |  |      |      | 0.38 |      | 0.39 |      |      |
| orflab           |      |  |      |      | 0.38 |      | 0.39 |      |      |
| p.K1407R         |      |  |      |      | 0.38 |      | 0.39 |      |      |
| 4710             |      |  |      |      |      |      |      |      | 0.31 |
| orflab           |      |  |      |      |      |      |      |      | 0.31 |
| p.A1482V         |      |  |      |      |      |      |      |      | 0.31 |
| 4864             | 0.43 |  | 0.71 | 0.33 | 0.38 | 0.25 |      |      |      |
| orflab           | 0.43 |  | 0.71 | 0.33 | 0.38 | 0.25 |      |      |      |
| p.K1533K         | 0.43 |  | 0.71 | 0.33 | 0.38 | 0.25 |      |      |      |
| 4865             | 0.43 |  | 0.71 | 0.33 | 0.38 | 0.25 |      |      |      |
| orflab           | 0.43 |  | 0.71 | 0.33 | 0.38 | 0.25 |      |      |      |
| p.S1534C         | 0.43 |  | 0.71 | 0.33 | 0.38 | 0.25 |      |      |      |
| 4868             | 0.43 |  | 0.71 | 0.33 | 0.38 | 0.25 |      |      |      |
| orflab           | 0.43 |  | 0.71 | 0.33 | 0.38 | 0.25 |      |      |      |
| p.V1535I         | 0.43 |  | 0.71 | 0.33 | 0.38 | 0.25 |      |      |      |
| 4956             |      |  |      | 0.31 |      |      |      | 0.35 |      |
| orflab           |      |  |      | 0.31 |      |      |      | 0.35 |      |
| p.E1564A         |      |  |      | 0.31 |      |      |      | 0.35 |      |
| 5288             |      |  | 0.61 |      |      |      |      |      |      |
| orflab           |      |  | 0.61 |      |      |      |      |      |      |
| p.Y1675H         |      |  | 0.61 |      |      |      |      |      |      |
| 5491             |      |  |      | 0.37 |      |      |      |      |      |
| orflab           |      |  |      | 0.37 |      |      |      |      |      |
| p.D1742D         |      |  |      | 0.37 |      |      |      |      |      |
| 5600             |      |  |      | 0.36 | 0.26 | 0.25 |      |      |      |
| orflab           |      |  |      | 0.36 | 0.26 | 0.25 |      |      |      |
| p.F1779L         |      |  |      | 0.36 | 0.26 | 0.25 |      |      |      |
| 5602             | 0.49 |  | 0.52 | 0.45 | 0.66 | 0.75 | 0.91 | 0.95 |      |
| orflab           | 0.49 |  | 0.52 | 0.45 | 0.66 | 0.75 | 0.91 | 0.95 |      |
| p.F1779L         | 0.49 |  | 0.52 | 0.45 | 0.66 | 0.75 | 0.91 | 0.95 |      |

|            |      |      |      |      |      |      |      |      |
|------------|------|------|------|------|------|------|------|------|
| 5648       | 1    | 1    | 1    | 1    | 1    | 1    | 1    | 1    |
| orf1ab     | 1    | 1    | 1    | 1    | 1    | 1    | 1    | 1    |
| p.K1795O   | 1    | 1    | 1    | 1    | 1    | 1    | 1    | 1    |
| 5730       |      | 0.39 |      |      |      |      |      |      |
| orf1ab     |      | 0.39 |      |      |      |      |      |      |
| p.T1822I   |      | 0.39 |      |      |      |      |      |      |
| 5767       | 0.26 | 0.39 |      |      |      |      |      |      |
| orf1ab     | 0.26 | 0.39 |      |      |      |      |      |      |
| p.G1834G   | 0.26 | 0.39 |      |      |      |      |      |      |
| 5792       |      |      |      |      |      |      | 0.28 | 0.38 |
| orf1ab     |      |      |      |      |      |      | 0.28 | 0.38 |
| p.E1843K   |      |      |      |      |      |      | 0.28 | 0.38 |
| 6068       | 0.39 |      |      |      |      |      |      |      |
| orf1ab     | 0.39 |      |      |      |      |      |      |      |
| p.I1935V   | 0.39 |      |      |      |      |      |      |      |
| 6080       | 0.5  |      |      |      |      |      |      |      |
| orf1ab     | 0.5  |      |      |      |      |      |      |      |
| p.D1939N   | 0.5  |      |      |      |      |      |      |      |
| 6120       | 0.34 |      |      |      |      |      |      |      |
| orf1ab     | 0.34 |      |      |      |      |      |      |      |
| p.S1952L   | 0.34 |      |      |      |      |      |      |      |
| 6135       | 0.35 |      |      |      |      |      |      |      |
| orf1ab     | 0.35 |      |      |      |      |      |      |      |
| p.V1957A   | 0.35 |      |      |      |      |      |      |      |
| 6227       | 0.43 | 0.4  | 0.45 | 0.5  | 0.42 | 0.59 | 0.67 |      |
| orf1ab     | 0.43 | 0.4  | 0.45 | 0.5  | 0.42 | 0.59 | 0.67 |      |
| p.K1988E   | 0.43 | 0.4  | 0.45 | 0.5  | 0.42 | 0.59 | 0.67 |      |
| 6233       |      |      |      | 0.27 |      |      |      | 0.28 |
| orf1ab     |      |      |      | 0.27 |      |      |      | 0.28 |
| p.V1991del |      |      |      | 0.27 |      |      |      | 0.28 |
| 6283       | 0.32 |      |      | 0.47 | 0.46 | 0.58 | 0.63 |      |
| orf1ab     | 0.32 |      |      | 0.47 | 0.46 | 0.58 | 0.63 |      |
| p.N2006N   | 0.32 |      |      | 0.47 | 0.46 | 0.58 | 0.63 |      |
| 6290       | 0.6  | 0.56 | 0.72 | 0.69 | 0.63 | 0.7  | 0.74 |      |
| orf1ab     | 0.6  | 0.56 | 0.72 | 0.69 | 0.63 | 0.7  | 0.74 |      |
| p.C2009G   | 0.6  | 0.56 |      | 0.69 | 0.63 | 0.7  | 0.74 |      |
| p.C2009V   |      |      | 0.72 |      |      |      |      |      |
| 6299       | 0.69 | 0.64 | 1    | 0.71 | 0.76 | 0.7  | 0.75 |      |
| orf1ab     | 0.69 | 0.64 | 1    | 0.71 | 0.76 | 0.7  | 0.75 |      |
| p.C2012S   | 0.69 | 0.64 | 1    | 0.71 | 0.76 | 0.7  | 0.75 |      |
| 6441       | 0.69 | 0.61 | 0.76 | 0.72 | 0.47 | 0.62 | 0.62 |      |
| orf1ab     | 0.69 | 0.61 | 0.76 | 0.72 | 0.47 | 0.62 | 0.62 |      |
| p.K2059R   | 0.69 | 0.61 | 0.76 | 0.72 | 0.47 | 0.62 | 0.62 |      |
| 6474       | 0.47 | 0.31 | 0.48 | 0.57 | 0.33 | 0.54 | 0.5  |      |
| orf1ab     | 0.47 | 0.31 | 0.48 | 0.57 | 0.33 | 0.54 | 0.5  |      |
| p.E2070G   | 0.47 | 0.31 | 0.48 | 0.57 | 0.33 | 0.54 | 0.5  |      |
| 6548       |      |      | 0.36 |      |      |      |      |      |
| orf1ab     |      |      | 0.36 |      |      |      |      |      |
| p.L2095fs  |      |      | 0.36 |      |      |      |      |      |
| 6617       |      |      | 0.43 |      |      |      |      |      |
| orf1ab     |      |      | 0.43 |      |      |      |      |      |
| p.G2118C   |      |      | 0.43 |      |      |      |      |      |
| 6638       |      | 0.88 |      |      |      |      |      |      |
| orf1ab     |      | 0.88 |      |      |      |      |      |      |
| p.H2125Y   |      | 0.88 |      |      |      |      |      |      |
| 6647       |      |      | 0.35 |      |      |      |      |      |
| orf1ab     |      |      | 0.35 |      |      |      |      |      |
| p.A2128P   |      |      | 0.35 |      |      |      |      |      |
| 6706       | 0.28 | 0.99 |      | 0.48 | 0.38 | 0.39 | 0.79 |      |
| orf1ab     | 0.28 | 0.99 |      | 0.48 | 0.38 | 0.39 | 0.79 |      |
| p.N2147N   | 0.28 | 0.99 |      | 0.48 | 0.38 | 0.39 | 0.79 |      |
| 6726       |      |      | 0.26 |      |      | 0.46 | 0.49 |      |
| orf1ab     |      |      | 0.26 |      |      | 0.46 | 0.49 |      |
| p.T2154I   |      |      | 0.26 |      |      | 0.46 | 0.49 |      |
| 6729       |      |      | 0.27 |      |      |      |      |      |
| orf1ab     |      |      | 0.27 |      |      |      |      |      |
| p.N2155S   |      |      | 0.27 |      |      |      |      |      |
| 6860       | 1    | 0.98 | 0.98 | 1    | 0.98 | 1    | 1    |      |
| orf1ab     | 1    | 0.98 | 0.98 | 1    | 0.98 | 1    | 1    |      |
| p.A2199T   | 1    | 0.98 | 0.98 | 1    | 0.98 | 1    | 1    |      |
| 6889       |      |      |      |      |      | 0.32 | 0.28 |      |
| orf1ab     |      |      |      |      |      | 0.32 | 0.28 |      |
| p.K2208K   |      |      |      |      |      | 0.32 | 0.28 |      |
| 7420       | 0.35 |      |      | 0.55 | 0.49 | 0.68 | 0.71 |      |
| orf1ab     | 0.35 |      |      | 0.55 | 0.49 | 0.68 | 0.71 |      |
| p.I2385I   | 0.35 |      |      | 0.55 | 0.49 | 0.68 | 0.71 |      |
| 8015       | 0.3  |      |      | 0.32 | 0.8  |      | 0.52 |      |
| orf1ab     | 0.3  |      |      | 0.32 | 0.8  |      | 0.52 |      |
| p.A2584T   | 0.3  |      |      | 0.32 | 0.8  |      | 0.52 |      |
| 8081       |      |      |      |      |      | 0.51 |      |      |
| orf1ab     |      |      |      |      |      | 0.51 |      |      |
| p.M2606V   |      |      |      |      |      | 0.51 |      |      |





|                  |      |      |      |      |      |      |      |  |
|------------------|------|------|------|------|------|------|------|--|
| n.D3972D         |      |      |      |      |      |      |      |  |
| 13019            |      |      | 0.49 |      |      |      |      |  |
| orf1ab           |      |      | 0.49 |      |      |      |      |  |
| n.L4252L         |      |      | 0.49 |      |      |      |      |  |
| 13076            |      |      | 0.33 |      |      |      |      |  |
| orf1ab           |      |      | 0.33 |      |      |      |      |  |
| n.A4271S         |      |      | 0.33 |      |      |      |      |  |
| 13647            | 1    | 0.99 | 1    | 1    | 1    | 0.99 | 1    |  |
| orf1ab           | 1    | 0.99 | 1    | 1    | 1    | 0.99 | 1    |  |
| p.T4461I         | 1    | 0.99 | 1    | 1    | 1    | 0.99 | 1    |  |
| 13728            | 0.58 | 0.81 | 0.66 | 0.55 |      |      | 0.33 |  |
| orf1ab           | 0.58 | 0.81 | 0.66 | 0.55 |      |      | 0.33 |  |
| p.L4489fs        | 0.58 | 0.81 | 0.66 | 0.55 |      |      | 0.33 |  |
| 13795            |      |      |      |      |      |      |      |  |
| orf1ab           |      |      |      |      |      |      |      |  |
| p.V4510V         |      |      |      |      |      |      |      |  |
| 13826            | 0.32 | 0.26 | 0.26 | 0.31 | 0.28 | 0.62 | 0.68 |  |
| orf1ab           | 0.32 | 0.26 | 0.26 | 0.31 | 0.28 | 0.62 | 0.68 |  |
| p.M4521fs        | 0.32 | 0.26 | 0.26 | 0.31 | 0.28 | 0.62 | 0.68 |  |
| 13928            | 0.45 | 0.37 | 0.68 | 0.34 | 0.46 | 0.49 | 0.28 |  |
| orf1ab           | 0.45 | 0.37 | 0.68 | 0.34 | 0.46 | 0.49 | 0.28 |  |
| p.M4555fs        | 0.45 | 0.37 | 0.68 | 0.34 | 0.46 | 0.49 | 0.28 |  |
| 13994            |      | 0.32 |      |      |      |      |      |  |
| orf1ab           |      | 0.32 |      |      |      |      |      |  |
| p.L4577F         |      | 0.32 |      |      |      |      |      |  |
| 14175            | 0.46 | 0.32 | 0.51 | 0.47 | 0.44 | 0.63 | 0.56 |  |
| orf1ab           | 0.46 | 0.32 | 0.51 | 0.47 | 0.44 | 0.63 | 0.56 |  |
| p.P4638fs        | 0.46 | 0.32 | 0.51 | 0.47 | 0.44 | 0.63 | 0.56 |  |
| 14201            | 0.66 | 0.53 | 0.79 | 0.59 | 0.45 | 0.75 | 0.65 |  |
| orf1ab           | 0.66 | 0.53 | 0.79 | 0.59 | 0.45 | 0.75 | 0.65 |  |
| p.S4646C         | 0.66 | 0.53 | 0.79 | 0.59 | 0.45 | 0.75 | 0.65 |  |
| 14219            | 0.59 | 0.62 | 0.59 | 0.65 | 0.51 | 0.7  | 0.69 |  |
| orf1ab           | 0.59 | 0.62 | 0.59 | 0.65 | 0.51 | 0.7  | 0.69 |  |
| p.T4652S         | 0.59 | 0.62 | 0.59 | 0.65 | 0.51 | 0.7  | 0.69 |  |
| 14229            | 0.26 | 0.45 |      | 0.35 |      | 0.65 | 0.6  |  |
| orf1ab           | 0.26 | 0.45 |      | 0.35 |      | 0.65 | 0.6  |  |
| p.S4655I         | 0.26 | 0.45 |      | 0.35 |      | 0.65 | 0.6  |  |
| 14246            | 0.35 |      | 0.5  | 0.28 | 0.25 |      |      |  |
| orf1ab           | 0.35 |      | 0.5  | 0.28 | 0.25 |      |      |  |
| p.I4661L         | 0.35 |      | 0.5  | 0.28 | 0.25 |      |      |  |
| 14320            | 0.27 | 0.5  |      | 0.28 |      | 0.61 | 0.52 |  |
| orf1ab           | 0.27 | 0.5  |      | 0.28 |      | 0.61 | 0.52 |  |
| p.H4685H         | 0.27 | 0.5  |      | 0.28 |      | 0.61 | 0.52 |  |
| 14322            | 0.42 |      | 0.66 | 0.42 | 0.39 |      |      |  |
| orf1ab           | 0.42 |      | 0.66 | 0.42 | 0.39 |      |      |  |
| p.T4686N         | 0.42 |      | 0.66 | 0.42 | 0.39 |      |      |  |
| 14407            | 0.32 | 0.36 | 0.42 | 0.33 | 0.33 | 0.33 | 0.38 |  |
| orf1ab           | 0.32 | 0.36 | 0.42 | 0.33 | 0.33 | 0.33 | 0.38 |  |
| p.L4715 V4717del | 0.32 | 0.36 | 0.42 | 0.33 | 0.33 | 0.33 | 0.38 |  |
| 14408            | 0.96 | 0.88 | 0.75 | 0.97 | 0.9  | 0.91 | 0.97 |  |
| orf1ab           | 0.96 | 0.88 | 0.75 | 0.97 | 0.9  | 0.91 | 0.97 |  |
| p.L4715L         | 0.96 | 0.88 | 0.75 | 0.97 | 0.9  | 0.91 | 0.97 |  |
| 14418            | 0.77 | 0.8  | 0.8  | 0.77 | 0.7  | 0.85 | 0.84 |  |
| orf1ab           | 0.77 | 0.8  | 0.8  | 0.77 | 0.7  | 0.85 | 0.84 |  |
| p.D4719fs        | 0.77 | 0.8  | 0.8  | 0.77 | 0.7  | 0.85 | 0.84 |  |
| 14447            |      |      |      |      |      |      |      |  |
| orf1ab           |      |      |      |      |      |      |      |  |
| p.M4728V         |      |      |      |      |      |      |      |  |
| 14479            | 0.28 |      |      |      | 0.25 | 0.39 | 0.34 |  |
| orf1ab           | 0.28 |      |      |      | 0.25 | 0.39 | 0.34 |  |
| p.T4738T         | 0.28 |      |      |      | 0.25 | 0.39 | 0.34 |  |
| 14483            |      | 0.64 |      | 0.25 |      | 0.47 | 0.47 |  |
| orf1ab           |      | 0.64 |      | 0.25 |      | 0.47 | 0.47 |  |
| p.S4740P         |      | 0.64 |      | 0.25 |      | 0.47 | 0.47 |  |
| 14539            | 0.36 | 0.48 |      | 0.33 | 0.34 | 0.32 | 0.39 |  |
| orf1ab           | 0.36 | 0.48 |      | 0.33 | 0.34 | 0.32 | 0.39 |  |
| p.V4759fs        | 0.36 | 0.48 |      | 0.33 | 0.34 | 0.32 | 0.39 |  |
| 14542            |      |      | 0.39 |      |      |      |      |  |
| orf1ab           |      |      | 0.39 |      |      |      |      |  |
| p.L4760del       |      |      | 0.39 |      |      |      |      |  |
| 14563            |      |      | 0.56 |      |      |      |      |  |
| orf1ab           |      |      | 0.56 |      |      |      |      |  |
| p.M4766I         |      |      | 0.56 |      |      |      |      |  |
| 15222            |      | 0.38 |      | 0.26 |      | 0.35 | 0.45 |  |
| orf1ab           |      | 0.38 |      | 0.26 |      | 0.35 | 0.45 |  |
| p.S4986F         |      | 0.38 |      | 0.26 |      | 0.35 | 0.45 |  |
| 15328            | 0.37 | 0.43 | 0.4  | 0.31 | 0.34 | 0.37 | 0.31 |  |
| orf1ab           | 0.37 | 0.43 | 0.4  | 0.31 | 0.34 | 0.37 | 0.31 |  |
| p.E5023 L5024del | 0.37 | 0.43 | 0.4  | 0.31 | 0.34 | 0.37 | 0.31 |  |
| 15349            | 0.38 | 0.56 | 0.46 | 0.34 | 0.37 | 0.37 | 0.34 |  |
| orf1ab           | 0.38 | 0.56 | 0.46 | 0.34 | 0.37 | 0.37 | 0.34 |  |
| p.L5028F         | 0.38 | 0.56 | 0.46 | 0.34 | 0.37 | 0.37 | 0.34 |  |

|                  |      |      |      |      |      |      |      |
|------------------|------|------|------|------|------|------|------|
| 15372            | 0.68 | 0.71 | 0.58 | 0.65 | 0.58 | 0.81 | 0.68 |
| orf1ab           | 0.68 | 0.71 | 0.58 | 0.65 | 0.58 | 0.81 | 0.68 |
| p.R5036H         | 0.68 | 0.71 | 0.58 | 0.65 | 0.58 | 0.81 | 0.68 |
| 15436            | 0.44 | 0.49 | 0.28 | 0.56 | 0.47 | 0.79 | 0.63 |
| orf1ab           | 0.44 | 0.49 | 0.28 | 0.56 | 0.47 | 0.79 | 0.63 |
| p.K5057N         | 0.44 | 0.49 | 0.28 | 0.56 | 0.47 | 0.79 | 0.63 |
| 15514            |      |      |      |      |      | 0.35 | 0.33 |
| orf1ab           |      |      |      |      |      | 0.35 | 0.33 |
| p.V5084 F5085del |      |      |      |      |      | 0.35 | 0.33 |
| 15566            |      |      |      |      | 0.26 |      |      |
| orf1ab           |      |      |      |      | 0.26 |      |      |
| p.L5101L         |      |      |      |      | 0.26 |      |      |
| 15683            |      |      |      |      |      |      | 0.29 |
| orf1ab           |      |      |      |      |      |      | 0.29 |
| p.I5140fs        |      |      |      |      |      |      | 0.29 |
| 15734            |      | 0.4  |      |      |      |      |      |
| orf1ab           |      | 0.4  |      |      |      |      |      |
| p.S5158fs        |      | 0.4  |      |      |      |      |      |
| 15916            | 0.28 | 0.26 | 0.36 |      |      |      |      |
| orf1ab           | 0.28 | 0.26 | 0.36 |      |      |      |      |
| p.M5218del       | 0.28 | 0.26 | 0.36 |      |      |      |      |
| 15956            | 0.62 | 0.49 | 0.57 | 0.55 | 0.61 | 0.53 | 0.58 |
| orf1ab           | 0.62 | 0.49 | 0.57 | 0.55 | 0.61 | 0.53 | 0.58 |
| p.G5231R         | 0.62 | 0.49 | 0.57 | 0.55 | 0.61 | 0.53 | 0.58 |
| 16008            |      | 0.42 | 0.37 |      |      | 0.26 |      |
| orf1ab           |      | 0.42 | 0.37 |      |      | 0.26 |      |
| p.L5248W         |      | 0.42 | 0.37 |      |      | 0.26 |      |
| 16024            |      | 0.28 |      |      |      |      |      |
| orf1ab           |      | 0.28 |      |      |      |      |      |
| p.*5254fs        |      | 0.28 |      |      |      |      |      |
| 16068            |      |      |      |      |      | 0.34 | 0.29 |
| orf1ab           |      |      |      |      |      | 0.34 | 0.29 |
| p.S5268I         |      |      |      |      |      | 0.34 | 0.29 |
| 17232            |      |      | 0.3  |      |      |      |      |
| orf1ab           |      |      | 0.3  |      |      |      |      |
| p.E5656G         |      |      | 0.3  |      |      |      |      |
| 18105            |      |      |      |      |      | 0.26 |      |
| orf1ab           |      |      |      |      |      | 0.26 |      |
| p.R5947K         |      |      |      |      |      | 0.26 |      |
| 18350            |      | 0.99 |      |      |      |      |      |
| orf1ab           |      | 0.99 |      |      |      |      |      |
| p.L6031 Y6032del |      | 0.99 |      |      |      |      |      |
| 18732            |      |      |      | 0.25 |      | 0.31 | 0.45 |
| orf1ab           |      |      |      | 0.25 |      | 0.31 | 0.45 |
| p.L6156*         |      |      |      | 0.25 |      | 0.31 | 0.45 |
| 19283            |      |      | 0.31 |      |      |      |      |
| orf1ab           |      |      | 0.31 |      |      |      |      |
| p.V6341del       |      |      | 0.31 |      |      |      |      |
| 19684            | 0.85 | 0.98 | 0.61 | 0.82 | 0.67 | 0.97 | 0.8  |
| orf1ab           | 0.85 | 0.98 | 0.61 | 0.82 | 0.67 | 0.97 | 0.8  |
| p.K6473K         | 0.85 | 0.98 | 0.61 | 0.82 | 0.67 | 0.97 | 0.8  |
| 20268            | 1    | 0.99 | 1    | 1    | 1    | 1    | 1    |
| orf1ab           | 1    | 0.99 | 1    | 1    | 1    | 1    | 1    |
| p.*6668Wext*?    | 1    | 0.99 | 1    | 1    | 1    | 1    | 1    |
| 20393            | 0.9  | 1    | 0.68 | 0.96 | 1    | 1    | 0.95 |
| orf1ab           | 0.9  | 1    | 0.68 | 0.96 | 1    | 1    | 0.95 |
| p.L6710L         | 0.9  | 1    | 0.68 | 0.96 | 1    | 1    | 0.95 |
| 20407            | 0.9  | 1    | 0.68 | 0.96 | 1    | 1    | 0.95 |
| orf1ab           | 0.9  | 1    | 0.68 | 0.96 | 1    | 1    | 0.95 |
| p.L6714L         | 0.9  | 1    | 0.68 | 0.96 | 1    | 1    | 0.95 |
| 20409            |      |      | 0.32 |      |      |      |      |
| orf1ab           |      |      | 0.32 |      |      |      |      |
| p.L6715*         |      |      | 0.32 |      |      |      |      |
| 20629            |      | 0.41 |      |      |      |      |      |
| orf1ab           |      | 0.41 |      |      |      |      |      |
| p.A6788A         |      | 0.41 |      |      |      |      |      |
| 20849            |      | 0.31 |      |      |      |      |      |
| orf1ab           |      | 0.31 |      |      |      |      |      |
| p.I6862V         |      | 0.31 |      |      |      |      |      |
| 20874            |      | 0.57 |      |      |      |      |      |
| orf1ab           |      | 0.57 |      |      |      |      |      |
| p.L6870O         |      | 0.57 |      |      |      |      |      |
| 21168            | 0.77 | 1    | 0.76 | 0.56 | 0.82 | 0.57 | 0.65 |
| orf1ab           | 0.77 | 1    | 0.76 | 0.56 | 0.82 | 0.57 | 0.65 |
| p.R6968K         | 0.77 | 1    | 0.76 | 0.56 | 0.82 | 0.57 | 0.65 |
| 21255            | 0.76 | 1    | 0.77 | 0.6  | 0.72 | 0.49 | 0.43 |
| orf1ab           | 0.76 | 1    | 0.77 | 0.6  | 0.72 | 0.49 | 0.43 |
| p.R6997P         | 0.76 | 1    | 0.77 | 0.6  | 0.72 | 0.49 | 0.43 |
| 21444            |      | 0.36 |      |      |      |      |      |
| orf1ab           |      | 0.36 |      |      |      |      |      |
| p.*7060Lext*?    |      | 0.36 |      |      |      |      |      |
| 21445            |      | 0.36 |      |      |      |      |      |



|           |      |      |      |      |      |      |      |      |
|-----------|------|------|------|------|------|------|------|------|
| S         |      |      |      |      |      |      |      | 0.62 |
| p.R237K   |      |      |      |      |      |      |      | 0.62 |
| 22276     |      |      |      |      |      |      |      | 1    |
| S         |      |      |      |      |      |      |      | 1    |
| p.F238F   |      |      |      |      |      |      |      | 1    |
| 22278     |      |      |      |      |      |      |      | 1    |
| S         |      |      |      |      |      |      |      | 1    |
| p.Q239R   |      |      |      |      |      |      |      | 1    |
| 22304     |      | 0.98 | 0.98 |      | 0.98 |      |      | 0.99 |
| S         |      | 0.98 | 0.98 |      | 0.98 |      |      | 0.99 |
| p.Y248H   |      | 0.98 | 0.98 |      | 0.98 |      |      |      |
| p.Y248R   |      |      |      |      |      |      |      | 0.99 |
| 22308     |      |      |      |      |      |      |      | 0.99 |
| S         |      |      |      |      |      |      |      | 0.99 |
| p.L249S   |      |      |      |      |      |      |      | 0.99 |
| 22311     |      | 0.85 | 0.72 |      |      |      |      |      |
| S         |      | 0.85 | 0.72 |      |      |      |      |      |
| p.T250N   |      | 0.85 | 0.72 |      |      |      |      |      |
| 22313     |      |      |      |      | 0.28 |      |      | 1    |
| S         |      |      |      |      | 0.28 |      |      | 1    |
| p.P251T   |      |      |      |      | 0.28 |      |      | 1    |
| 22322     |      |      | 0.29 |      | 0.71 |      |      |      |
| S         |      |      | 0.29 |      | 0.71 |      |      |      |
| p.S254P   |      |      | 0.29 |      | 0.71 |      |      |      |
| 22332     |      | 0.99 | 0.99 |      | 0.72 |      |      |      |
| S         |      | 0.99 | 0.99 |      | 0.72 |      |      |      |
| p.G257D   |      | 0.99 | 0.99 |      | 0.72 |      |      |      |
| 22341     | 0.99 | 0.98 | 0.38 | 0.94 | 0.54 | 0.46 |      | 0.86 |
| S         | 0.99 | 0.98 | 0.38 | 0.94 | 0.54 | 0.46 |      | 0.86 |
| p.A260V   | 0.99 | 0.98 | 0.38 | 0.94 | 0.54 | 0.46 |      | 0.86 |
| 22384     |      |      | 0.32 |      |      |      |      |      |
| S         |      |      | 0.32 |      |      |      |      |      |
| p.T274T   |      |      | 0.32 |      |      |      |      |      |
| 22391     |      |      |      |      |      |      | 0.39 |      |
| S         |      |      |      |      |      |      | 0.39 |      |
| p.L277L   |      |      |      |      |      |      | 0.39 |      |
| 22487     |      |      | 0.61 |      |      |      |      |      |
| S         |      |      | 0.61 |      |      |      |      |      |
| p.E309K   |      |      | 0.61 |      |      |      |      |      |
| 22518     |      | 1    |      |      |      |      |      |      |
| S         |      | 1    |      |      |      |      |      |      |
| p.R319I   |      | 1    |      |      |      |      |      |      |
| 22556     |      | 1    |      |      |      |      |      |      |
| S         |      | 1    |      |      |      |      |      |      |
| p.I332V   |      | 1    |      |      |      |      |      |      |
| 22567     |      |      | 0.29 |      |      |      |      |      |
| S         |      |      | 0.29 |      |      |      |      |      |
| p.L335F   |      |      | 0.29 |      |      |      |      |      |
| 22599     | 0.74 | 1    | 1    | 0.95 | 0.39 | 1    |      | 1    |
| S         | 0.74 | 1    | 1    | 0.95 | 0.39 | 1    |      | 1    |
| p.R346T   | 0.74 | 1    | 1    | 0.95 | 0.39 | 1    |      | 1    |
| 22622     |      |      |      |      |      |      | 0.56 |      |
| S         |      |      |      |      |      |      | 0.56 |      |
| p.N354D   |      |      |      |      |      |      | 0.56 |      |
| 22661     | 0.8  | 1    | 1    | 0.97 | 1    | 1    |      | 1    |
| S         | 0.8  | 1    | 1    | 0.97 | 1    | 1    |      | 1    |
| p.V367F   | 0.8  | 1    | 1    | 0.97 | 1    | 1    |      | 1    |
| 22678     | 0.42 |      |      | 0.71 | 0.29 | 0.89 |      | 0.84 |
| S         | 0.42 |      |      | 0.71 | 0.29 | 0.89 |      | 0.84 |
| p.S373fs  | 0.42 |      |      | 0.71 | 0.29 | 0.89 |      | 0.84 |
| 22683     |      | 0.92 |      | 0.36 | 0.86 | 0.99 |      | 0.35 |
| S         |      | 0.92 |      | 0.36 | 0.86 | 0.99 |      | 0.35 |
| p.F374Y   |      | 0.92 |      | 0.36 | 0.86 | 0.99 |      | 0.35 |
| 22685     | 0.84 | 0.95 | 0.99 | 0.91 | 1    | 0.98 |      | 0.98 |
| S         | 0.84 | 0.95 | 0.99 | 0.91 | 1    | 0.98 |      | 0.98 |
| p.S375P   | 0.84 | 0.95 | 0.99 | 0.91 | 1    | 0.98 |      | 0.98 |
| 22688     | 0.43 |      |      | 0.71 | 0.29 | 0.89 |      | 0.84 |
| S         | 0.43 |      |      | 0.71 | 0.29 | 0.89 |      | 0.84 |
| p.T376fs  | 0.43 |      |      | 0.71 | 0.29 | 0.89 |      | 0.84 |
| 22689     | 0.51 | 1    | 1    | 0.29 | 0.71 |      |      |      |
| S         | 0.51 | 1    | 1    | 0.29 | 0.71 |      |      |      |
| p.F377del | 0.51 | 1    | 1    | 0.29 | 0.71 |      |      |      |
| 22692     |      |      |      |      |      |      | 0.33 |      |
| S         |      |      |      |      |      |      | 0.33 |      |
| p.F377S   |      |      |      |      |      |      | 0.33 |      |
| 22713     | 0.99 | 0.74 | 0.89 | 0.99 | 0.99 | 1    |      | 1    |
| S         | 0.99 | 0.74 | 0.89 | 0.99 | 0.99 | 1    |      | 1    |
| p.P384L   | 0.99 | 0.74 | 0.89 | 0.99 | 0.99 | 1    |      | 1    |
| 22785     | 0.78 |      | 0.84 | 0.77 | 0.48 | 0.85 |      | 0.8  |
| S         | 0.78 |      | 0.84 | 0.77 | 0.48 | 0.85 |      | 0.8  |
| p.R408K   | 0.78 |      | 0.84 | 0.77 | 0.48 | 0.85 |      | 0.8  |
| 22799     | 0.4  |      | 0.39 |      |      |      |      | 0.38 |

|          |      |      |      |      |      |      |      |
|----------|------|------|------|------|------|------|------|
| S        | 0.4  |      | 0.39 |      |      |      | 0.38 |
| p.G413R  | 0.4  |      | 0.39 |      |      |      | 0.38 |
| 22812    | 0.98 | 1    | 1    | 1    | 1    | 1    | 1    |
| S        | 0.98 | 1    | 1    | 1    | 1    | 1    | 1    |
| p.K417T  | 0.98 | 1    | 1    | 1    | 1    | 1    | 1    |
| 22833    |      | 0.68 |      |      |      |      |      |
| S        |      | 0.68 |      |      |      |      |      |
| p.K424I  |      | 0.68 |      |      |      |      |      |
| 22834    |      | 0.68 |      |      |      |      |      |
| S        |      | 0.68 |      |      |      |      |      |
| p.L425fs |      | 0.68 |      |      |      |      |      |
| 22882    | 0.94 | 0.98 | 0.85 | 0.43 | 0.3  | 0.26 | 0.39 |
| S        | 0.94 | 0.98 | 0.85 | 0.43 | 0.3  | 0.26 | 0.39 |
| p.N440K  | 0.94 | 0.98 | 0.85 | 0.43 | 0.3  | 0.26 | 0.39 |
| 22895    | 0.74 | 0.62 | 0.85 |      |      |      |      |
| S        | 0.74 | 0.62 | 0.85 |      |      |      |      |
| p.V445P  | 0.74 | 0.62 | 0.85 |      |      |      |      |
| 22896    |      |      |      | 1    | 0.99 | 1    | 0.99 |
| S        |      |      |      | 1    | 0.99 | 1    | 0.99 |
| p.V445A  |      |      |      | 1    | 0.99 | 1    | 0.99 |
| 22900    |      |      |      | 0.26 |      |      |      |
| S        |      |      |      | 0.26 |      |      |      |
| p.G447fs |      |      |      | 0.26 |      |      |      |
| 22905    |      |      |      | 0.26 |      |      |      |
| S        |      |      |      | 0.26 |      |      |      |
| p.N448fs |      |      |      | 0.26 |      |      |      |
| 22907    | 0.98 | 1    | 1    | 1    | 1    | 1    | 1    |
| S        | 0.98 | 1    | 1    | 1    | 1    | 1    | 1    |
| p.Y449H  | 0.98 | 1    | 1    | 1    | 1    | 1    | 1    |
| 22917    | 0.43 |      |      | 0.54 | 0.33 | 0.4  | 0.43 |
| S        | 0.43 |      |      | 0.54 | 0.33 | 0.4  | 0.43 |
| p.L452Q  | 0.43 |      |      | 0.54 | 0.33 | 0.4  | 0.43 |
| 22920    |      |      |      | 0.36 |      | 0.29 |      |
| S        |      |      |      | 0.36 |      | 0.29 |      |
| p.Y453F  |      |      |      | 0.36 |      | 0.29 |      |
| 22942    | 1    | 1    | 1    | 1    | 1    | 1    | 1    |
| S        | 1    | 1    | 1    | 1    | 1    | 1    | 1    |
| p.N460K  | 1    | 1    | 1    | 1    | 1    | 1    | 1    |
| 22992    | 0.98 | 1    | 1    | 0.98 | 0.98 | 0.91 | 0.91 |
| S        | 0.98 | 1    | 1    | 0.98 | 0.98 | 0.91 | 0.91 |
| p.S477N  | 0.98 | 1    | 1    | 0.98 | 0.98 | 0.91 | 0.91 |
| 23010    | 0.44 |      | 0.86 | 0.44 |      |      |      |
| S        | 0.44 |      | 0.86 | 0.44 |      |      |      |
| p.V483A  | 0.44 |      | 0.86 | 0.44 |      |      |      |
| 23012    | 1    | 1    | 1    | 0.98 | 1    | 0.95 | 0.91 |
| S        | 1    | 1    | 1    | 0.98 | 1    | 0.95 | 0.91 |
| p.E484P  | 1    | 1    | 1    | 0.98 | 1    | 0.95 |      |
| p.E484Q  |      |      |      |      |      |      | 0.91 |
| 23018    | 0.99 | 1    | 1    | 0.99 | 1    | 1    | 1    |
| S        | 0.99 | 1    | 1    | 0.99 | 1    | 1    | 1    |
| p.F486A  | 0.99 | 1    | 1    | 0.99 | 1    | 1    | 1    |
| 23031    |      |      |      | 0.51 | 0.75 | 0.73 | 0.69 |
| S        |      |      |      | 0.51 | 0.75 | 0.73 | 0.69 |
| p.F490Y  |      |      |      | 0.51 | 0.75 | 0.73 | 0.69 |
| 23039    | 1    | 1    | 1    | 1    | 1    | 1    | 1    |
| S        | 1    | 1    | 1    | 1    | 1    | 1    | 1    |
| p.O493K  | 1    | 1    | 1    | 1    | 1    | 1    | 1    |
| 23042    | 0.64 | 0.99 | 0.99 |      |      |      |      |
| S        | 0.64 | 0.99 | 0.99 |      |      |      |      |
| p.S494P  | 0.64 | 0.99 | 0.99 |      |      |      |      |
| 23054    | 0.94 | 0.98 | 0.99 |      |      |      |      |
| S        | 0.94 | 0.98 | 0.99 |      |      |      |      |
| p.Q498*  | 0.94 | 0.98 | 0.99 |      |      |      |      |
| p.Q498R  |      |      |      |      |      |      |      |
| 23055    |      |      |      | 0.32 | 0.38 | 0.65 | 0.62 |
| S        |      |      |      | 0.32 | 0.38 | 0.65 | 0.62 |
| p.Q498R  |      |      |      | 0.32 | 0.38 | 0.65 | 0.62 |
| 23056    | 0.94 | 0.98 | 0.99 |      |      |      |      |
| S        | 0.94 | 0.98 | 0.99 |      |      |      |      |
| p.Q498H  | 0.94 | 0.98 | 0.99 |      |      |      |      |
| 23057    | 0.91 | 0.98 | 0.99 |      |      |      |      |
| S        | 0.91 | 0.98 | 0.99 |      |      |      |      |
| p.P499S  | 0.91 | 0.98 | 0.99 |      |      |      |      |
| 23063    |      |      |      | 0.82 | 0.88 | 0.89 | 0.9  |
| S        |      |      |      | 0.82 | 0.88 | 0.89 | 0.9  |
| p.N501Y  |      |      |      | 0.82 | 0.88 | 0.89 | 0.9  |
| 23064    | 0.93 | 0.98 | 0.99 |      |      |      |      |
| S        | 0.93 | 0.98 | 0.99 |      |      |      |      |
| p.N501S  | 0.93 | 0.98 | 0.99 |      |      |      |      |
| 23075    | 0.94 | 0.98 | 0.99 |      |      |      | 0.5  |
| S        | 0.94 | 0.98 | 0.99 |      |      |      | 0.5  |
| p.Y505H  | 0.94 | 0.98 | 0.99 |      |      |      | 0.5  |

|          |      |      |      |      |      |      |      |      |      |
|----------|------|------|------|------|------|------|------|------|------|
| 23084    |      |      |      |      |      |      |      |      | 0.42 |
| S        |      |      |      |      |      |      |      |      | 0.42 |
| p.Y508N  |      |      |      |      |      |      |      |      | 0.42 |
| 23119    | 0.67 |      | 0.66 | 0.38 | 0.68 | 0.62 |      |      | 0.85 |
| S        | 0.67 |      | 0.66 | 0.38 | 0.68 | 0.62 |      |      | 0.85 |
| p.H519Q  | 0.67 |      | 0.66 | 0.38 | 0.68 | 0.62 |      |      | 0.85 |
| 23157    | 0.4  | 0.33 | 0.56 |      |      |      |      |      |      |
| S        | 0.4  | 0.33 | 0.56 |      |      |      |      |      |      |
| p.N532S  | 0.4  | 0.33 | 0.56 |      |      |      |      |      |      |
| 23224    |      |      |      |      |      |      |      |      |      |
| S        |      |      |      |      |      |      |      |      |      |
| p.E554D  |      |      |      |      |      |      |      |      |      |
| 23403    | 1    | 1    | 1    | 1    | 1    | 1    | 1    | 1    | 1    |
| S        | 1    | 1    | 1    | 1    | 1    | 1    | 1    | 1    | 1    |
| p.D614G  | 1    | 1    | 1    | 1    | 1    | 1    | 1    | 1    | 1    |
| 23427    | 0.27 |      |      | 0.53 | 0.44 | 0.75 |      |      | 0.81 |
| S        | 0.27 |      |      | 0.53 | 0.44 | 0.75 |      |      | 0.81 |
| p.V622G  | 0.27 |      |      | 0.53 | 0.44 | 0.75 |      |      | 0.81 |
| 23594    |      |      |      | 0.33 | 0.51 |      |      |      |      |
| S        |      |      |      | 0.33 | 0.51 |      |      |      |      |
| p.T678P  |      |      |      | 0.33 | 0.51 |      |      |      |      |
| 23601    |      |      |      |      |      |      |      | 0.36 |      |
| S        |      |      |      |      |      |      |      | 0.36 |      |
| p.S680F  |      |      |      |      |      |      |      | 0.36 |      |
| 23877    |      |      |      | 0.29 | 0.37 |      |      |      |      |
| S        |      |      |      | 0.29 | 0.37 |      |      |      |      |
| p.V772A  |      |      |      | 0.29 | 0.37 |      |      |      |      |
| 23898    | 0.34 | 1    | 0.26 |      |      | 0.28 |      |      |      |
| S        | 0.34 | 1    | 0.26 |      |      | 0.28 |      |      |      |
| p.O779R  | 0.34 | 1    | 0.26 |      |      | 0.28 |      |      |      |
| 23900    |      |      | 0.3  |      |      |      |      |      |      |
| S        |      |      | 0.3  |      |      |      |      |      |      |
| p.E780O  |      |      | 0.3  |      |      |      |      |      |      |
| 23939    |      | 0.68 |      | 0.44 | 0.32 | 0.77 |      |      | 0.6  |
| S        |      | 0.68 |      | 0.44 | 0.32 | 0.77 |      |      | 0.6  |
| p.P793S  |      | 0.68 |      | 0.44 | 0.32 | 0.77 |      |      | 0.6  |
| 24044    | 0.99 | 0.99 | 0.99 | 0.99 | 1    | 0.91 |      |      | 0.79 |
| S        | 0.99 | 0.99 | 0.99 | 0.99 | 1    | 0.91 |      |      | 0.79 |
| p.L828F  | 0.51 |      | 0.99 | 0.38 | 0.41 |      |      |      |      |
| p.L828V  | 0.48 | 0.99 |      | 0.61 | 0.59 | 0.91 |      |      | 0.79 |
| 24379    |      | 0.32 |      |      |      |      |      |      |      |
| S        |      | 0.32 |      |      |      |      |      |      |      |
| p.S939S  |      | 0.32 |      |      |      |      |      |      |      |
| 24380    | 0.98 | 1    | 0.99 | 1    | 1    | 1    | 1    | 1    | 1    |
| S        | 0.98 | 1    | 0.99 | 1    | 1    | 1    | 1    | 1    | 1    |
| p.S940T  | 0.98 | 1    | 0.99 | 1    | 1    | 1    | 1    | 1    | 1    |
| 24716    | 0.32 | 1    |      | 0.47 |      | 0.82 |      |      | 0.91 |
| S        | 0.32 | 1    |      | 0.47 |      | 0.82 |      |      | 0.91 |
| p.F1052L | 0.32 | 1    |      | 0.47 |      | 0.82 |      |      | 0.91 |
| 25020    | 1    | 1    | 1    | 1    | 1    | 1    | 1    | 1    | 1    |
| S        | 1    | 1    | 1    | 1    | 1    | 1    | 1    | 1    | 1    |
| p.D1153A | 1    | 1    | 1    | 1    | 1    | 1    | 1    | 1    | 1    |
| 25055    |      | 0.54 | 0.27 |      |      |      |      |      |      |
| S        |      | 0.54 | 0.27 |      |      |      |      |      |      |
| p.D1165N |      | 0.54 | 0.27 |      |      |      |      |      |      |
| 25088    | 1    | 1    | 0.99 | 1    | 0.99 | 1    | 1    | 1    | 1    |
| S        | 1    | 1    | 0.99 | 1    | 0.99 | 1    | 1    | 1    | 1    |
| p.V1176F | 1    | 1    | 0.99 | 1    | 0.99 | 1    | 1    | 1    | 1    |
| 25116    | 0.99 | 0.99 | 0.99 | 1    | 0.99 | 0.99 | 0.99 | 0.99 | 0.99 |
| S        | 0.99 | 0.99 | 0.99 | 1    | 0.99 | 0.99 | 0.99 | 0.99 | 0.99 |
| p.R1185H | 0.99 | 0.99 | 0.99 | 1    | 0.99 | 0.99 | 0.99 | 0.99 | 0.99 |
| 25162    |      |      |      | 0.38 | 0.32 | 0.76 |      |      | 0.69 |
| S        |      |      |      | 0.38 | 0.32 | 0.76 |      |      | 0.69 |
| p.L1200L |      |      |      | 0.38 | 0.32 | 0.76 |      |      | 0.69 |
| 25163    |      |      |      | 0.38 | 0.32 | 0.76 |      |      | 0.69 |
| S        |      |      |      | 0.38 | 0.32 | 0.76 |      |      | 0.69 |
| p.O1201K |      |      |      | 0.38 | 0.32 | 0.76 |      |      | 0.69 |
| 25207    |      |      |      |      |      | 0.37 |      |      |      |
| S        |      |      |      |      |      | 0.37 |      |      |      |
| p.Y1215Y |      |      |      |      |      | 0.37 |      |      |      |
| 25208    |      |      |      | 0.29 |      | 0.91 |      |      | 0.74 |
| S        |      |      |      | 0.29 |      | 0.91 |      |      | 0.74 |
| p.I1216V |      |      |      | 0.29 |      | 0.91 |      |      | 0.74 |
| 25223    |      |      |      | 0.33 | 0.6  | 0.45 |      |      |      |
| S        |      |      |      | 0.33 | 0.6  | 0.45 |      |      |      |
| p.I1221V |      |      |      | 0.33 | 0.6  | 0.45 |      |      |      |
| 25254    | 1    | 1    | 0.99 | 1    | 1    | 1    | 1    | 1    | 1    |
| S        | 1    | 1    | 0.99 | 1    | 1    | 1    | 1    | 1    | 1    |
| p.T1231I | 1    | 1    | 0.99 | 1    | 1    | 1    | 1    | 1    | 1    |
| 25342    | 0.83 | 0.95 | 0.82 | 0.69 | 0.88 | 0.64 |      |      | 0.54 |
| S        | 0.83 | 0.95 | 0.82 | 0.69 | 0.88 | 0.64 |      |      | 0.54 |
| p.D1260E | 0.83 | 0.95 | 0.82 | 0.69 | 0.88 | 0.64 |      |      | 0.54 |

|                  |      |      |      |      |      |      |      |
|------------------|------|------|------|------|------|------|------|
| 25344            | 0.84 | 1    | 0.92 | 0.77 | 0.79 | 0.9  | 0.7  |
| S                | 0.84 | 1    | 0.92 | 0.77 | 0.79 | 0.9  | 0.7  |
| p.S1261F         | 0.84 | 1    | 0.92 | 0.77 | 0.79 | 0.9  | 0.7  |
| 25411            | 0.44 | 0.7  |      | 0.34 | 0.52 | 0.49 | 0.39 |
| ORF3a            | 0.44 | 0.7  |      | 0.34 | 0.52 | 0.49 | 0.39 |
| p.I7L            | 0.44 | 0.7  |      | 0.34 | 0.52 | 0.49 | 0.39 |
| 25420            | 0.52 | 0.29 | 0.67 | 0.56 | 0.48 |      | 0.4  |
| ORF3a            | 0.52 | 0.29 | 0.67 | 0.56 | 0.48 |      | 0.4  |
| p.I10L           | 0.52 | 0.29 | 0.67 | 0.56 | 0.48 |      | 0.4  |
| 25494            |      |      |      |      |      |      |      |
| ORF3a            |      |      |      |      |      |      |      |
| p.T34T           |      |      |      |      |      |      |      |
| 25510            |      | 0.84 |      |      |      | 0.28 |      |
| ORF3a            |      | 0.84 |      |      |      | 0.28 |      |
| p.S40T           |      | 0.84 |      |      |      | 0.28 |      |
| 25522            |      |      |      |      |      |      | 0.61 |
| ORF3a            |      |      |      |      |      |      | 0.61 |
| p.G44R           |      |      |      |      |      |      | 0.61 |
| 25546            |      | 0.66 |      |      |      |      |      |
| ORF3a            |      | 0.66 |      |      |      |      |      |
| p.L52I           |      | 0.66 |      |      |      |      |      |
| 25613            |      |      |      |      | 0.28 |      |      |
| ORF3a            |      |      |      |      | 0.28 |      |      |
| p.S74C           |      |      |      |      | 0.28 |      |      |
| 25623            |      |      |      | 0.28 | 0.28 |      |      |
| ORF3a            |      |      |      | 0.28 | 0.28 |      |      |
| p.V77V           |      |      |      | 0.28 | 0.28 |      |      |
| 25689            |      | 0.45 | 0.47 |      |      | 0.39 |      |
| ORF3a            |      | 0.45 | 0.47 |      |      | 0.39 |      |
| p.A99A           |      | 0.45 | 0.47 |      |      | 0.39 |      |
| 25698            |      |      |      |      |      |      | 0.28 |
| ORF3a            |      |      |      |      |      |      | 0.28 |
| p.E102E          |      |      |      |      |      |      | 0.28 |
| 25846            | 1    | 1    | 1    | 1    | 1    | 1    | 1    |
| ORF3a            | 1    | 1    | 1    | 1    | 1    | 1    | 1    |
| p.N152H          | 1    | 1    | 1    | 1    | 1    | 1    | 1    |
| 25936            | 1    | 1    | 1    | 1    | 1    | 1    | 1    |
| ORF3a            | 1    | 1    | 1    | 1    | 1    | 1    | 1    |
| p.H182D          | 1    | 1    | 1    | 1    | 1    | 1    | 1    |
| 25974            | 0.35 | 0.58 | 0.29 |      |      | 0.37 |      |
| ORF3a            | 0.35 | 0.58 | 0.29 |      |      | 0.37 |      |
| p.E194E          | 0.35 | 0.58 | 0.29 |      |      | 0.37 |      |
| 25979            | 1    | 1    | 1    | 1    | 1    | 1    | 1    |
| ORF3a            | 1    | 1    | 1    | 1    | 1    | 1    | 1    |
| p.G196E          | 1    | 1    | 1    | 1    | 1    | 1    | 1    |
| 25991            | 1    | 1    | 1    | 1    | 1    | 1    | 1    |
| ORF3a            | 1    | 1    | 1    | 1    | 1    | 1    | 1    |
| p.C200Y          | 1    | 1    | 1    | 1    | 1    | 1    | 1    |
| 26047            |      |      | 1    | 1    |      | 1    | 0.96 |
| ORF3a            |      |      | 1    | 1    |      | 1    | 0.96 |
| p.L219V          |      |      | 1    | 1    |      | 1    | 0.96 |
| 26157            |      | 0.44 |      |      |      |      |      |
| ORF3a            |      | 0.44 |      |      |      |      |      |
| p.V256 V259del   |      | 0.44 |      |      |      |      |      |
| 26166            |      | 0.32 |      |      |      |      |      |
| ORF3a            |      | 0.32 |      |      |      |      |      |
| p.P258P          |      | 0.32 |      |      |      |      |      |
| 26228            |      |      |      |      |      | 0.33 | 0.29 |
| E                |      |      |      |      |      | 0.33 | 0.29 |
|                  |      |      |      |      |      | 0.33 | 0.29 |
| 26424            |      |      | 0.49 |      |      |      |      |
| E                |      |      | 0.49 |      |      |      |      |
| p.S60S           |      |      | 0.49 |      |      |      |      |
| 26527            | 0.99 | 1    | 1    | 1    | 1    | 1    | 1    |
| M                | 0.99 | 1    | 1    | 1    | 1    | 1    | 1    |
| p.A2E            | 0.99 | 1    | 1    | 1    | 1    | 1    | 1    |
| 26533            |      | 0.32 |      |      |      |      |      |
| M                |      | 0.32 |      |      |      |      |      |
| p.S4F            |      | 0.32 |      |      |      |      |      |
| 26538            | 0.99 | 0.99 | 1    | 1    | 1    | 1    | 1    |
| M                | 0.99 | 0.99 | 1    | 1    | 1    | 1    | 1    |
| p.G6C            | 0.99 | 0.99 | 1    | 1    | 1    | 1    | 1    |
| 26544            | 0.96 | 0.91 | 0.8  | 0.96 | 0.94 | 0.96 | 0.92 |
| M                | 0.96 | 0.91 | 0.8  | 0.96 | 0.94 | 0.96 | 0.92 |
| p.I8delinsSNNSEF | 0.96 | 0.91 | 0.8  | 0.96 | 0.94 | 0.96 | 0.92 |
| 26557            |      |      | 0.3  |      |      |      |      |
| M                |      |      | 0.3  |      |      |      |      |
| p.E12V           |      |      | 0.3  |      |      |      |      |
| 26571            | 1    | 0.99 | 1    | 1    | 1    | 1    | 1    |
| M                | 1    | 0.99 | 1    | 1    | 1    | 1    | 1    |
| p.L17V           | 1    | 0.99 | 1    | 1    | 1    | 1    | 1    |
| 26590            | 0.38 | 0.84 | 0.6  | 0.75 | 1    | 0.72 | 0.89 |

|                  |      |      |      |      |      |      |      |
|------------------|------|------|------|------|------|------|------|
| M                | 0.38 | 0.84 | 0.6  | 0.75 | 1    | 0.72 | 0.89 |
| p.V23A           | 0.38 | 0.84 | 0.6  | 0.75 | 1    | 0.72 | 0.89 |
| 27285            | 0.99 | 1    | 0.86 | 1    | 1    | 1    | 1    |
| ORF6             | 0.99 | 1    | 0.86 | 1    | 1    | 1    | 1    |
| p.N28K           | 0.99 | 1    | 0.86 | 1    | 1    | 1    | 1    |
| 27568            | 0.68 |      | 0.59 | 0.89 | 0.85 | 0.91 | 0.96 |
| ORF7a            | 0.68 |      | 0.59 | 0.89 | 0.85 | 0.91 | 0.96 |
| p.F59I           | 0.68 |      | 0.59 | 0.89 | 0.85 | 0.91 | 0.96 |
| 27609            |      |      | 0.37 |      |      |      |      |
| ORF7a            |      |      | 0.37 |      |      |      |      |
| p.K72K           |      |      | 0.37 |      |      |      |      |
| 27634            | 0.97 | 1    | 0.74 | 1    | 1    | 1    | 1    |
| ORF7a            | 0.97 | 1    | 0.74 | 1    | 1    | 1    | 1    |
| p.S81P           | 0.97 | 1    | 0.74 | 1    | 1    | 1    | 1    |
| 27765            |      |      | 0.31 |      |      |      |      |
| ORF8             |      |      | 0.31 |      |      |      |      |
|                  |      |      | 0.31 |      |      |      |      |
| 27916            |      |      |      |      |      | 0.34 |      |
| ORF8             |      |      |      |      |      | 0.34 |      |
| p.G8E            |      |      |      |      |      | 0.34 |      |
| 27929            |      |      |      |      | 0.39 |      |      |
| ORF8             |      |      |      |      | 0.39 |      |      |
| p.T12T           |      |      |      |      | 0.39 |      |      |
| 28040            |      |      |      |      |      |      |      |
| ORF8             |      |      |      |      |      |      |      |
| p.V49V           |      |      |      |      |      |      |      |
| 28064            | 0.53 | 0.97 | 0.44 |      |      |      |      |
| ORF8             | 0.53 | 0.97 | 0.44 |      |      |      |      |
| p.I58fs          | 0.53 | 0.97 | 0.44 |      |      |      |      |
| 28089            | 0.31 |      | 0.56 | 0.52 | 0.87 | 0.5  | 0.62 |
| ORF8             | 0.31 |      | 0.56 | 0.52 | 0.87 | 0.5  | 0.62 |
| p.G66_K68delinsE | 0.31 |      | 0.56 | 0.52 | 0.87 | 0.5  | 0.62 |
| 28207            |      |      |      |      |      |      |      |
| ORF8             |      |      |      |      |      |      |      |
| p.Y105fs         |      |      |      |      |      |      |      |
| 28244            |      |      |      | 0.43 | 0.66 |      | 0.33 |
| ORF8             |      |      |      | 0.43 | 0.66 |      | 0.33 |
| p.L118fs         |      |      |      | 0.43 | 0.66 |      | 0.33 |
| 28249            |      |      |      | 0.43 | 0.66 |      | 0.33 |
| ORF8             |      |      |      | 0.43 | 0.66 |      | 0.33 |
| p.F120fs         |      |      |      | 0.43 | 0.66 |      | 0.33 |
| 28271            |      |      |      |      |      | 0.67 |      |
| N                |      |      |      |      |      | 0.67 |      |
|                  |      |      |      |      |      | 0.67 |      |
| 28311            |      |      |      |      |      | 0.66 |      |
| N                |      |      |      |      |      | 0.66 |      |
| p.P13L           |      |      |      |      |      | 0.66 |      |
| 28321            | 1    | 0.98 | 0.99 | 1    | 0.99 | 0.4  | 0.87 |
| N                | 1    | 0.98 | 0.99 | 1    | 0.99 | 0.4  | 0.87 |
| p.T16T           | 1    | 0.98 | 0.99 | 1    | 0.99 | 0.4  | 0.87 |
| 28330            |      |      |      |      |      | 0.51 |      |
| N                |      |      |      |      |      | 0.51 |      |
| p.G19G           |      |      |      |      |      | 0.51 |      |
| 28340            |      |      |      |      |      |      |      |
| N                |      |      |      |      |      |      |      |
| p.S23P           |      |      |      |      |      |      |      |
| 28358            |      |      |      |      |      |      |      |
| N                |      |      |      |      |      |      |      |
| p.N29D           |      |      |      |      |      |      |      |
| 28361            |      |      |      |      |      | 0.54 |      |
| N                |      |      |      |      |      | 0.54 |      |
| p.E31_S33del     |      |      |      |      |      | 0.54 |      |
| 28365            | 0.41 | 0.79 | 0.99 | 0.73 | 0.77 | 0.47 | 0.72 |
| N                | 0.41 | 0.79 | 0.99 | 0.73 | 0.77 | 0.47 | 0.72 |
| p.E31A           | 0.41 | 0.79 | 0.99 | 0.73 | 0.77 | 0.47 | 0.72 |
| 28374            |      |      |      |      |      |      |      |
| N                |      |      |      |      |      |      |      |
| p.G34E           |      |      |      |      |      |      |      |
| 28376            |      |      |      |      |      | 0.32 |      |
| N                |      |      |      |      |      | 0.32 |      |
| p.A35T           |      |      |      |      |      | 0.32 |      |
| 28382            | 1    | 1    | 1    | 1    | 1    | 0.45 | 0.89 |
| N                | 1    | 1    | 1    | 1    | 1    | 0.45 | 0.89 |
| p.S37P           | 1    | 1    | 1    | 1    | 1    | 0.45 | 0.89 |
| 28402            |      | 0.41 |      |      |      |      |      |
| N                |      | 0.41 |      |      |      |      |      |
| p.Q43Q           |      | 0.41 |      |      |      |      |      |
| 28753            | 0.59 | 0.37 | 0.84 | 0.86 | 0.54 | 0.9  | 0.7  |
| N                | 0.59 | 0.37 | 0.84 | 0.86 | 0.54 | 0.9  | 0.7  |
| p.Q160Q          | 0.59 | 0.37 | 0.84 | 0.86 | 0.54 | 0.9  | 0.7  |
| 28854            | 1    | 1    | 1    | 1    | 1    | 1    | 0.91 |
| N                | 1    | 1    | 1    | 1    | 1    | 1    | 0.91 |



|           |      |      |      |      |      |      |      |
|-----------|------|------|------|------|------|------|------|
| p.S194L   | 1    | 1    | 1    | 1    | 1    | 1    | 0.91 |
| 29249     | 0.99 | 1    | 0.99 | 1    | 1    | 1    | 1    |
| N         | 0.99 | 1    | 0.99 | 1    | 1    | 1    | 1    |
| p.P326S   | 0.99 | 1    | 0.99 | 1    | 1    | 1    | 1    |
| 29389     | 0.33 | 0.27 |      |      |      |      |      |
| N         | 0.33 | 0.27 |      |      |      |      |      |
| p.K375dup | 0.33 | 0.27 |      |      |      |      |      |
| 29400     |      |      | 0.47 |      |      |      |      |
| N         |      |      | 0.47 |      |      |      |      |
| p.D377del |      |      | 0.47 |      |      |      |      |
| 29494     |      |      | 0.48 |      |      |      |      |
| N         |      |      | 0.48 |      |      |      |      |
| p.L407L   |      |      | 0.48 |      |      |      |      |
| 29512     | 0.39 | 0.53 |      | 0.57 | 0.53 | 0.55 | 0.5  |
| N         | 0.39 | 0.53 |      | 0.57 | 0.53 | 0.55 | 0.5  |
| p.S413R   | 0.39 | 0.53 |      | 0.57 | 0.53 | 0.55 | 0.5  |
| 29516     |      |      | 0.45 |      |      |      |      |
| N         |      |      | 0.45 |      |      |      |      |
| p.D415fs  |      |      | 0.45 |      |      |      |      |
| 29538     |      | 0.32 | 0.49 |      |      |      |      |
| ORF10     |      | 0.32 | 0.49 |      |      |      |      |
|           |      | 0.32 | 0.49 |      |      |      |      |
| 29666     |      | 0.84 | 0.51 |      |      |      | 0.51 |
| ORF10     |      | 0.84 | 0.51 |      |      |      | 0.51 |
| p.L37F    |      | 0.84 | 0.51 |      |      |      | 0.51 |
| 29688     |      |      |      |      | 0.28 |      | 0.33 |
| S         |      |      |      |      | 0.28 |      | 0.33 |
|           |      |      |      |      | 0.28 |      | 0.33 |
| 29758     | 1    | 1    |      | 1    | 1    | 0.99 | 0.99 |
| S         | 1    | 1    |      | 1    | 1    | 0.99 | 0.99 |
|           | 1    | 1    |      | 1    | 1    | 0.99 | 0.99 |
| 29828     |      |      |      | 0.42 |      | 0.33 | 0.59 |
| S         |      |      |      | 0.42 |      | 0.33 | 0.59 |
|           |      |      |      | 0.42 |      | 0.33 | 0.59 |

**Supplemental Table 2. All SARS-CoV-2 variants identified in Facility Line B whole genome sequences.** Illumina whole genome sequencing data of overlapping PCR amplicons from Facility Line B were processed using the nf-core/viralrecon workflow. Variants from reference Wuhan-Hu-1 called by iVar at a frequency of at least 25% in any of the sequencing replicates from any of our four sampling time points are shown along with their location in the genome and predicted protein impact. The content of this table has not been altered in any way from the content of the iVar “variants\_long\_table.csv”. In some cases there are inaccuracies with the variant calls that we have left for the sake of reproducibility. See the Supplemental Table 3 legend for a specific example of this.

| Variant frequency summed by codon |             | 16-Jun-22    |            |            | 16-Aug-22    |            | 23-Sep-22    |            | 27-Sep-22    |            | Sum   | Average | Variants               | B.1.234 |
|-----------------------------------|-------------|--------------|------------|------------|--------------|------------|--------------|------------|--------------|------------|-------|---------|------------------------|---------|
|                                   |             | 3 replicates |            |            | 2 replicates |            | 2 replicates |            | 2 replicates |            |       |         |                        |         |
| Gene                              | Codon       | #1 WSLH-15   | #2 WSLH-22 | #3 WSLH-23 | #1 WSLH-20   | #2 WSLH-23 | #1 WSLH-22   | #2 WSLH-22 | #1 WSLH-22   | #2 WSLH-22 |       |         |                        |         |
| ORF1ab                            | L4715       | 1.28         | 1.24       | 1.17       | 1.3          | 1.23       | 1.24         | 1.35       | 1.2          | 1.31       | 11.32 | 1.26    | L4715 V4717del; L4715L | *       |
| ORF1ab                            | V38         | 1            | 1          | 1          | 1            | 1          | 1            | 1          | 1            | 1          | 9     | 1.00    | V38A                   |         |
| ORF1ab                            | F924        | 1            | 1          | 1          | 1            | 1          | 1            | 1          | 1            | 1          | 9     | 1.00    | F924F                  |         |
| ORF1ab                            | A1234       | 1            | 1          | 1          | 1            | 1          | 1            | 1          | 1            | 1          | 9     | 1.00    | A1234A                 |         |
| ORF1ab                            | D2980       | 1            | 1          | 1          | 1            | 1          | 1            | 1          | 1            | 1          | 9     | 1.00    | D2980G                 | *       |
| ORF1ab                            | K1795       | 1            | 1          | 1          | 1            | 1          | 1            | 1          | 0.99         | 1          | 8.99  | 1.00    | K1795Q                 |         |
| ORF1ab                            | *6668Wext*? | 1            | 0.99       | 1          | 1            | 1          | 1            | 1          | 1            | 1          | 8.99  | 1.00    | stop lost              |         |
| ORF1ab                            | T4461       | 1            | 0.99       | 1          | 1            | 1          | 0.99         | 1          | 1            | 1          | 8.98  | 1.00    | T4461I                 |         |
| ORF1ab                            | L3606       | 0.99         | 1          | 1          | 0.99         | 0.99       | 1            | 1          | 1            | 1          | 8.97  | 1.00    | L3606V                 |         |
| ORF1ab                            | S2625       | 1            | 1          | 1          | 1            | 1          | 0.99         | 0.99       | 0.99         | 0.99       | 8.96  | 1.00    | S2625S                 |         |
| ORF1ab                            | V665        | 1            | 1          | 1          | 0.99         | 1          | 1            | 1          | 0.96         | 1          | 8.95  | 0.99    | V665I                  | *       |
| ORF1ab                            | A2199       | 1            | 0.98       | 0.98       | 1            | 0.98       | 1            | 1          | 0.95         | 1          | 8.89  | 0.99    | A2199T                 |         |
| ORF1ab                            | R24         | 0.94         | 0.99       | 0.87       | 0.98         | 0.99       | 0.93         | 0.92       | 0.89         | 0.93       | 8.44  | 0.94    | R24C                   |         |
| ORF1ab                            | L6710       | 0.9          | 1          | 0.68       | 0.96         | 1          | 1            | 0.95       | 0.92         | 1          | 8.41  | 0.93    | L6710L                 |         |
| ORF1ab                            | L6714       | 0.9          | 1          | 0.68       | 0.96         | 1          | 1            | 0.95       | 0.91         | 1          | 8.4   | 0.93    | L6714L                 |         |
| ORF1ab                            | S3149       | 0.94         | 0.46       | 1          | 0.98         | 1          | 0.98         | 0.95       | 0.9          | 1          | 8.21  | 0.91    | S3149F                 |         |
| ORF1ab                            | I3148       | 0.93         | 0.41       | 0.92       | 0.98         | 0.91       | 0.98         | 0.95       | 0.9          | 1          | 7.98  | 0.89    | I3148L; I3148P         |         |
| ORF1ab                            | L123        | 0.78         | 0.87       | 0.96       | 0.89         | 0.57       | 0.86         | 0.92       | 0.96         | 0.97       | 7.78  | 0.86    | L123F                  |         |
| ORF1ab                            | F3677       | 0.65         | 0.86       | 0.98       | 0.79         | 0.53       | 1            | 0.87       | 0.92         | 0.84       | 7.44  | 0.83    | F3677I                 |         |
| ORF1ab                            | T3258       | 0.93         | 0.99       |            | 0.94         | 0.99       | 0.79         | 0.94       | 0.91         | 0.88       | 7.37  | 0.92    | T3258T                 |         |
| ORF1ab                            | D4719       | 0.77         | 0.8        | 0.8        | 0.77         | 0.7        | 0.85         | 0.84       | 0.92         | 0.87       | 7.32  | 0.81    | D4719fs                |         |
| ORF1ab                            | F1779       | 0.49         | 0.52       | 0.81       | 0.92         | 1          | 0.91         | 0.95       | 0.77         | 0.66       | 7.03  | 0.78    | F1779L; F1779L         |         |
| ORF1ab                            | T3058       | 0.53         | 0.52       | 1          | 0.75         | 1          | 0.84         | 0.75       | 0.79         | 0.84       | 7.02  | 0.78    | T3058V; T3058A         |         |
| ORF1ab                            | K6473       | 0.85         | 0.98       | 0.61       | 0.82         | 0.67       | 0.97         | 0.8        | 0.62         | 0.65       | 6.97  | 0.77    | K6473K                 |         |
| ORF1ab                            | L92         | 0.67         | 0.74       | 0.63       | 0.67         | 0.81       | 0.82         | 0.8        | 0.87         | 0.83       | 6.84  | 0.76    | L92F                   |         |
| ORF1ab                            | C2012       | 0.69         | 0.64       | 1          | 0.71         | 0.76       | 0.7          | 0.75       | 0.76         | 0.82       | 6.83  | 0.76    | C2012S                 |         |
| ORF1ab                            | S167        | 0.75         | 1          | 0.54       | 0.68         | 0.81       | 0.77         | 0.67       | 0.55         | 0.84       | 6.61  | 0.73    | S167G                  |         |
| ORF1ab                            | M85         | 0.65         | 0.74       | 0.52       | 0.63         | 0.73       | 0.75         | 0.75       | 0.84         | 0.82       | 6.43  | 0.71    | M85fs                  |         |
| ORF1ab                            | N9          | 0.58         | 0.45       | 0.46       | 0.69         | 0.71       | 0.91         | 0.86       | 0.87         | 0.81       | 6.34  | 0.70    | N9N                    |         |
| ORF1ab                            | C2009       | 0.6          | 0.56       | 0.72       | 0.69         | 0.63       | 0.7          | 0.74       | 0.76         | 0.83       | 6.23  | 0.69    | C2009G; C2009V         |         |
| ORF1ab                            | R6968       | 0.77         | 1          | 0.76       | 0.56         | 0.82       | 0.57         | 0.65       | 0.59         | 0.5        | 6.22  | 0.69    | R6968K                 |         |
| ORF1ab                            | R5036       | 0.68         | 0.71       | 0.58       | 0.65         | 0.58       | 0.81         | 0.68       | 0.78         | 0.7        | 6.17  | 0.69    | R5036H                 |         |
| ORF1ab                            | S4646       | 0.66         | 0.53       | 0.79       | 0.59         | 0.45       | 0.75         | 0.65       | 0.83         | 0.81       | 6.06  | 0.67    | S4646C                 |         |
| ORF1ab                            | K2059       | 0.69         | 0.61       | 0.76       | 0.72         | 0.47       | 0.62         | 0.62       | 0.77         | 0.79       | 6.05  | 0.67    | K2059R                 | *       |
| ORF1ab                            | R6997       | 0.76         | 1          | 0.77       | 0.6          | 0.72       | 0.49         | 0.43       | 0.5          | 0.77       | 6.04  | 0.67    | R6997P                 |         |
| ORF1ab                            | T4652       | 0.59         | 0.62       | 0.59       | 0.65         | 0.51       | 0.7          | 0.69       | 0.82         | 0.8        | 5.97  | 0.66    | T4652S                 |         |
| ORF1ab                            | S1188       |              | 0.97       |            | 0.57         | 0.93       | 0.65         | 0.96       | 0.88         | 0.95       | 5.91  | 0.84    | S1188L                 |         |
| ORF1ab                            | A1306       | 0.58         | 0.62       | 0.78       | 0.61         | 0.53       | 0.5          | 0.48       | 0.58         | 0.8        | 5.48  | 0.61    | A1306T                 |         |
| ORF1ab                            | G5231       | 0.62         | 0.49       | 0.57       | 0.55         | 0.61       | 0.53         | 0.58       | 0.56         | 0.53       | 5.04  | 0.56    | G5231R                 |         |
| ORF1ab                            | K5057       | 0.44         | 0.49       | 0.28       | 0.56         | 0.47       | 0.79         | 0.63       | 0.74         | 0.57       | 4.97  | 0.55    | K5057N                 |         |
| ORF1ab                            | T727        | 0.31         | 0.7        | 0.29       | 0.65         | 0.84       | 0.38         | 0.52       | 0.59         | 0.67       | 4.95  | 0.55    | T727I                  |         |
| ORF1ab                            | K1988       | 0.43         | 0.4        | 0.45       | 0.5          | 0.42       | 0.59         | 0.67       | 0.7          | 0.73       | 4.89  | 0.54    | K1988E                 |         |
| ORF1ab                            | R43         | 0.47         | 0.91       | 0.84       | 0.35         | 0.48       | 0.44         | 0.59       | 0.36         | 0.36       | 4.8   | 0.53    | R43R                   |         |
| ORF1ab                            | P4638       | 0.46         | 0.32       | 0.51       | 0.47         | 0.44       | 0.63         | 0.56       | 0.64         | 0.68       | 4.71  | 0.52    | P4638fs                |         |
| ORF1ab                            | E2070       | 0.47         | 0.31       | 0.48       | 0.57         | 0.33       | 0.54         | 0.5        | 0.66         | 0.6        | 4.46  | 0.50    | E2070G                 |         |
| ORF1ab                            | T2823       | 0.54         |            | 0.44       | 0.58         | 0.35       | 0.6          | 0.76       | 0.57         | 0.55       | 4.39  | 0.55    | T2823A                 |         |
| ORF1ab                            | N128        |              |            | 0.42       | 0.44         | 0.31       | 0.78         | 0.68       | 0.92         | 0.83       | 4.38  | 0.63    | N128N                  |         |
| ORF1ab                            | G82         | 0.4          | 0.47       | 0.48       | 0.36         | 0.57       | 0.47         | 0.48       | 0.6          | 0.52       | 4.35  | 0.48    | G82fs                  |         |
| ORF1ab                            | I2385       | 0.35         |            |            | 0.55         | 0.49       | 0.68         | 0.71       | 0.78         | 0.74       | 4.3   | 0.61    | I2385I                 |         |
| ORF1ab                            | N854        | 0.49         | 0.45       | 0.39       | 0.49         | 0.61       | 0.49         | 0.62       | 0.27         | 0.35       | 4.16  | 0.46    | N854D                  |         |
| ORF1ab                            | M4555       | 0.45         | 0.37       | 0.68       | 0.34         | 0.46       | 0.49         | 0.28       | 0.49         | 0.57       | 4.13  | 0.46    | M4555fs                |         |
| ORF1ab                            | I1159       | 0.48         | 0.4        | 1          | 0.45         | 0.34       | 0.45         |            | 0.34         | 0.43       | 3.89  | 0.49    | I1159T                 |         |
| ORF1ab                            | M4521       | 0.32         | 0.26       | 0.26       | 0.31         | 0.28       | 0.62         | 0.68       | 0.67         | 0.47       | 3.87  | 0.43    | M4521fs                |         |
| ORF1ab                            | G445        | 0.34         | 0.43       | 0.38       | 0.42         | 0.58       | 0.52         | 0.58       | 0.28         | 0.29       | 3.82  | 0.42    | G445C                  |         |
| ORF1ab                            | N2006       | 0.32         |            |            | 0.47         | 0.46       | 0.58         | 0.63       | 0.62         | 0.73       | 3.81  | 0.54    | N2006N                 |         |
| ORF1ab                            | H1160       | 0.37         | 0.42       |            | 0.31         | 0.49       | 0.55         | 0.82       | 0.44         | 0.39       | 3.79  | 0.47    | H1160Y; H1160Q         |         |
| ORF1ab                            | L5028       | 0.38         | 0.56       | 0.46       | 0.34         | 0.37       | 0.37         | 0.34       | 0.53         | 0.42       | 3.77  | 0.42    | L5028F                 |         |
| ORF1ab                            | S4655       | 0.26         | 0.45       |            | 0.35         |            | 0.65         | 0.6        | 0.68         | 0.65       | 3.64  | 0.52    | S4655I                 |         |

|        |       |      |      |      |      |      |      |      |      |      |      |      |                            |   |
|--------|-------|------|------|------|------|------|------|------|------|------|------|------|----------------------------|---|
| ORF1ab | S74   |      | 0.38 | 0.45 | 0.28 | 0.48 | 0.45 | 0.52 | 0.55 | 0.47 | 3.58 | 0.45 | S74T                       |   |
| ORF1ab | E5023 | 0.37 | 0.43 | 0.4  | 0.31 | 0.34 | 0.37 | 0.31 | 0.46 | 0.39 | 3.38 | 0.38 | E5023_L5024del             |   |
| ORF1ab | Q22   | 0.27 |      | 0.46 | 0.36 | 0.41 | 0.41 | 0.45 | 0.51 | 0.41 | 3.28 | 0.41 | Q22K                       |   |
| ORF1ab | E57   | 0.38 | 0.62 | 0.4  | 0.29 | 0.27 | 0.33 | 0.44 |      | 0.27 | 3    | 0.38 | E57K                       |   |
| ORF1ab | L27   |      |      | 0.53 | 0.33 | 0.36 | 0.41 | 0.45 | 0.51 | 0.41 | 3    | 0.43 | L27F                       |   |
| ORF1ab | S4740 |      | 0.64 |      | 0.25 |      | 0.47 | 0.47 | 0.43 | 0.31 | 2.57 | 0.43 | S4740P                     |   |
| ORF1ab | A2584 | 0.3  |      |      | 0.32 | 0.8  |      | 0.52 | 0.27 |      | 2.21 | 0.44 | A2584T                     |   |
| ORF1ab | T4738 | 0.28 |      |      |      | 0.25 | 0.39 | 0.34 | 0.4  | 0.43 | 2.09 | 0.35 | T4738T                     |   |
| ORF1ab | H165  | 0.25 |      | 0.46 | 0.3  |      |      | 0.33 | 0.45 |      | 1.79 | 0.36 | H165Y                      |   |
| ORF1ab | S4986 |      | 0.38 |      | 0.26 |      | 0.35 | 0.45 | 0.29 |      | 1.73 | 0.35 | S4986F                     |   |
| S      | N460  | 1    | 1    | 1    | 1    | 1    | 1    | 1    | 1    | 1    | 9    | 1.00 | N460K                      |   |
| S      | Q493  | 1    | 1    | 1    | 1    | 1    | 1    | 1    | 1    | 1    | 9    | 1.00 | Q493K                      |   |
| S      | D614  | 1    | 1    | 1    | 1    | 1    | 1    | 1    | 1    | 1    | 9    | 1.00 | D614G                      | * |
| S      | D1153 | 1    | 1    | 1    | 1    | 1    | 1    | 1    | 1    | 1    | 9    | 1.00 | D1153A                     |   |
| S      | T1231 | 1    | 1    | 0.99 | 1    | 1    | 1    | 1    | 1    | 1    | 8.99 | 1.00 | T1231H                     |   |
| S      | K417  | 0.98 | 1    | 1    | 1    | 1    | 1    | 1    | 1    | 1    | 8.98 | 1.00 | K417T                      |   |
| S      | Y449  | 0.98 | 1    | 1    | 1    | 1    | 1    | 1    | 1    | 1    | 8.98 | 1.00 | Y449H                      |   |
| S      | V1176 | 1    | 1    | 0.99 | 1    | 0.99 | 1    | 1    | 1    | 1    | 8.98 | 1.00 | V1176F                     |   |
| S      | S940  | 0.98 | 1    | 0.99 | 1    | 1    | 1    | 1    | 1    | 1    | 8.97 | 1.00 | S940T                      |   |
| S      | D215  | 1    | 1    | 0.98 | 1    | 0.99 | 1    | 1    | 1    | 1    | 8.97 | 1.00 | D215G                      |   |
| S      | F486  | 0.99 | 1    | 1    | 0.99 | 1    | 1    | 1    | 0.98 | 1    | 8.96 | 1.00 | F486A                      |   |
| S      | R214  | 1    | 0.98 | 0.99 | 1    | 0.99 | 0.99 | 0.99 | 1    | 1    | 8.94 | 0.99 | R214S                      |   |
| S      | Q14   | 0.99 | 1    | 1    | 0.99 | 0.99 | 0.95 | 1    | 1    | 1    | 8.92 | 0.99 | Q14L                       |   |
| S      | R1185 | 0.99 | 0.99 | 0.99 | 1    | 0.99 | 0.99 | 0.99 | 0.99 | 0.99 | 8.92 | 0.99 | R1185H                     |   |
| S      | K150  | 0.98 | 0.87 | 1    | 0.99 | 1    | 1    | 0.98 | 1    | 1    | 8.82 | 0.98 | K150N                      |   |
| S      | V367  | 0.8  | 1    | 1    | 0.97 | 1    | 1    | 1    | 1    | 1    | 8.77 | 0.97 | V367F                      |   |
| S      | L828  | 0.99 | 0.99 | 0.99 | 0.99 | 1    | 0.91 | 0.79 | 0.99 | 1    | 8.65 | 0.96 | L828V; L828F               |   |
| S      | S375  | 0.84 | 0.95 | 0.99 | 0.91 | 1    | 0.98 | 0.98 | 1    | 0.99 | 8.64 | 0.96 | S375P                      |   |
| S      | P384  | 0.99 | 0.74 | 0.89 | 0.99 | 0.99 | 1    | 1    | 1    | 1    | 8.6  | 0.96 | P384L                      |   |
| S      | Q498  | 1.88 | 1.96 | 1.98 | 0.32 | 0.38 | 0.65 | 0.62 | 0.37 | 0.43 | 8.59 | 0.95 | Q498*; Q498R; Q498S; Q498H |   |
| S      | S477  | 0.98 | 1    | 1    | 0.98 | 0.98 | 0.91 | 0.91 | 0.81 | 1    | 8.57 | 0.95 | S477N                      |   |
| S      | E484  | 1    | 1    | 1    | 0.98 | 1    | 0.95 | 0.91 | 0.79 | 0.84 | 8.47 | 0.94 | E484P; E484Q               |   |
| S      | T19   | 0.86 | 0.86 | 0.85 | 0.94 | 0.98 | 0.87 | 1    | 1    | 1    | 8.36 | 0.93 | T19K                       |   |
| S      | N501  | 0.93 | 0.98 | 0.99 | 0.82 | 0.88 | 0.89 | 0.9  | 0.98 | 0.97 | 8.34 | 0.93 | N501Y; N501S               |   |
| S      | V445  | 0.74 | 0.62 | 0.85 | 1    | 0.99 | 1    | 0.99 | 1    | 1    | 8.19 | 0.91 | V445P; V445A               |   |
| S      | N137  | 0.91 | 0.89 | 0.86 | 0.98 | 0.87 | 0.82 | 0.78 | 0.96 | 0.89 | 7.96 | 0.88 | N137K                      |   |
| S      | R346  | 0.74 | 1    | 1    | 0.95 | 0.39 | 1    | 1    | 0.79 | 1    | 7.87 | 0.87 | R346T                      |   |
| S      | S1261 | 0.84 | 1    | 0.92 | 0.77 | 0.79 | 0.9  | 0.7  | 0.97 | 0.96 | 7.85 | 0.87 | S1261F                     |   |
| S      | D1260 | 0.83 | 0.95 | 0.82 | 0.69 | 0.88 | 0.64 | 0.54 | 0.86 | 0.75 | 6.96 | 0.77 | D1260E                     |   |
| S      | A260  | 0.99 | 0.98 | 0.38 | 0.94 | 0.54 | 0.46 | 0.86 |      | 0.99 | 6.14 | 0.77 | A260V                      |   |
| S      | H69   | 0.58 | 0.91 | 0.69 | 0.57 | 0.83 | 0.6  | 0.58 | 0.56 | 0.61 | 5.93 | 0.66 | H69_V70del                 |   |
| S      | R408  | 0.78 |      | 0.84 | 0.77 | 0.48 | 0.85 | 0.8  | 0.62 | 0.58 | 5.72 | 0.72 | R408K                      |   |
| S      | H66   | 0.38 | 1    | 0.35 | 0.52 | 0.65 | 0.96 | 0.79 | 0.73 | 0.31 | 5.69 | 0.63 | H66R                       |   |
| S      | N440  | 0.94 | 0.98 | 0.85 | 0.43 | 0.3  | 0.26 | 0.39 | 0.55 | 0.77 | 5.47 | 0.61 | N440K                      |   |
| S      | Q173  | 0.56 | 0.48 | 1    | 0.41 | 0.35 | 0.82 | 0.7  | 0.55 | 0.33 | 5.2  | 0.58 | Q173K; Q173R; Q173S        |   |
| S      | H519  | 0.67 |      | 0.66 | 0.38 | 0.68 | 0.62 | 0.85 | 0.72 | 0.57 | 5.15 | 0.64 | H519Q                      |   |
| S      | Y248  |      | 0.98 | 0.98 |      | 0.98 |      | 0.99 |      | 1    | 4.93 | 0.99 | Y248R; Y248H               |   |
| S      | F1052 | 0.32 | 1    |      | 0.47 |      | 0.82 | 0.91 | 0.54 | 0.76 | 4.82 | 0.69 | F1052L                     |   |
| S      | L24   | 0.59 |      |      | 0.61 | 0.69 | 0.66 | 0.95 | 0.68 | 0.42 | 4.6  | 0.66 | L24S                       |   |
| S      | F374  |      | 0.92 |      | 0.36 | 0.86 | 0.99 | 0.35 | 0.39 | 0.45 | 4.32 | 0.62 | F374Y                      |   |
| S      | S373  | 0.42 |      |      | 0.71 | 0.29 | 0.89 | 0.84 | 0.5  | 0.54 | 4.19 | 0.60 | S373fs                     |   |
| S      | L48   | 0.44 |      |      | 0.55 | 0.56 | 0.78 | 0.83 | 0.7  | 0.3  | 4.16 | 0.59 | L48I                       |   |
| S      | Y145  | 0.31 |      |      | 0.59 | 0.63 | 0.82 | 0.77 | 0.46 | 0.43 | 4.01 | 0.57 | Y145H                      |   |
| S      | P793  |      | 0.68 |      | 0.44 | 0.32 | 0.77 | 0.6  | 0.41 | 0.36 | 3.58 | 0.51 | P793S                      |   |
| S      | T76   | 0.63 |      | 0.56 | 0.49 | 0.38 |      | 0.26 | 0.31 | 0.79 | 3.42 | 0.49 | T76I                       |   |
| ORF3a  | N152  | 1    | 1    | 1    | 1    | 1    | 1    | 1    | 1    | 1    | 9    | 1.00 | N152H                      |   |
| ORF3a  | H182  | 1    | 1    | 1    | 1    | 1    | 1    | 1    | 1    | 1    | 9    | 1.00 | H182D                      |   |
| ORF3a  | G196  | 1    | 1    | 1    | 1    | 1    | 1    | 1    | 1    | 1    | 9    | 1.00 | G196E                      |   |
| ORF3a  | C200  | 1    | 1    | 1    | 1    | 1    | 1    | 1    | 1    | 1    | 9    | 1.00 | C200Y                      |   |
| ORF3a  | L219  |      |      | 1    | 1    |      | 1    | 0.96 | 1    | 1    | 5.96 | 0.99 | L219V                      |   |
| ORF3a  | I10   | 0.52 | 0.29 | 0.67 | 0.56 | 0.48 |      | 0.4  | 0.58 | 0.55 | 4.05 | 0.51 | I10L                       |   |

|       |      |      |      |      |      |      |      |      |      |      |      |      |                |   |
|-------|------|------|------|------|------|------|------|------|------|------|------|------|----------------|---|
| ORF3a | I7   | 0.44 | 0.7  |      | 0.34 | 0.52 | 0.49 | 0.39 | 0.3  |      | 3.18 | 0.45 | I7L            |   |
| M     | A2   | 0.99 | 1    | 1    | 1    | 1    | 1    | 1    | 1    | 1    | 8.99 | 1.00 | A2E            |   |
| M     | G6   | 0.99 | 0.99 | 1    | 1    | 1    | 1    | 1    | 0.99 | 1    | 8.97 | 1.00 | G6C            |   |
| M     | L17  | 1    | 0.99 | 1    | 1    | 1    | 1    | 1    | 0.97 | 1    | 8.96 | 1.00 | L17V           |   |
| M     | I8   | 0.96 | 0.91 | 0.8  | 0.96 | 0.94 | 0.96 | 0.92 | 0.96 | 0.91 | 8.32 | 0.92 | I8delinsSNNSEF |   |
| M     | V23  | 0.38 | 0.84 | 0.6  | 0.75 | 1    | 0.72 | 0.89 | 0.84 | 0.53 | 6.55 | 0.73 | V23A           |   |
| ORF6  | N28  | 0.99 | 1    | 0.86 | 1    | 1    | 1    | 1    | 1    | 1    | 8.85 | 0.98 | N28K           |   |
| ORF7a | S81  | 0.97 | 1    | 0.74 | 1    | 1    | 1    | 1    | 1    | 1    | 8.71 | 0.97 | S81P           |   |
| ORF7a | F59  | 0.68 |      | 0.59 | 0.89 | 0.85 | 0.91 | 0.96 | 1    | 1    | 6.88 | 0.86 | F59I           |   |
| ORF8  | G66  | 0.31 |      | 0.56 | 0.52 | 0.87 | 0.5  | 0.62 | 0.52 | 1    | 4.9  | 0.61 | G66_K68delinsE |   |
| N     | P326 | 0.99 | 1    | 0.99 | 1    | 1    | 1    | 1    | 0.99 | 1    | 8.97 | 1.00 | P326S          |   |
| N     | S194 | 1    | 1    | 1    | 1    | 1    | 1    | 0.91 | 1    | 1    | 8.91 | 0.99 | S194L          | * |
| N     | S37  | 1    | 1    | 1    | 1    | 1    | 0.45 | 0.89 | 0.55 | 0.65 | 7.54 | 0.84 | S37P           |   |
| N     | T16  | 1    | 0.98 | 0.99 | 1    | 0.99 | 0.4  | 0.87 | 0.43 | 0.56 | 7.22 | 0.80 | T16T           |   |
| N     | E31  | 0.41 | 0.79 | 0.99 | 0.73 | 0.77 | 1.01 | 0.72 | 0.81 | 0.84 | 7.07 | 0.79 | E31_S33del     |   |
| N     | Q160 | 0.59 | 0.37 | 0.84 | 0.86 | 0.54 | 0.9  | 0.7  | 1    | 0.91 | 6.71 | 0.75 | Q160Q          |   |
| N     | S413 | 0.39 | 0.53 |      | 0.57 | 0.53 | 0.55 | 0.5  | 0.54 | 0.48 | 4.09 | 0.51 | S413R          |   |

**Supplemental Table 3. Shared SARS-CoV-2 variants found in June, August, and September 2022 Facility Line B sequences.** Variants called by iVar<sup>2</sup> found in whole genome sequences at every time point in Supplemental Table 2 are shown here grouped by codon and sorted by gene and frequency. The frequencies of multiple variants within one codon are summed, leading to some codons with multiple variants having frequencies above 1.0. Variants characteristic of Pango lineage B.1.234, as noted on outbreak.info (<https://outbreak.info/>), are marked with an asterisk.<sup>3</sup> One of the variants typical of B.1.234 is P4715L. iVar called a synonymous “L4715L” variant at this position in all Facility Line B sequences, while a manual inspection of consensus sequences aligned with the Wuhan-Hu-1 reference instead found the P4715L non-synonymous variant known in B.1.234. We believe that this mistake by iVar could be due to multiple deletions in this area of the genome. We have reported it as-called for the sake of reproducibility. Due to the number of deletions and frameshifts present in our whole genome sequences, there may be more cases like this elsewhere.
